1  
2 **The oral drug nitazoxanide restricts SARS-CoV-2 infection and attenuates**  
3 **disease pathogenesis in Syrian hamsters**  
4

5  
6 §Lisa Miorin<sup>1,2,#</sup>, Chad E. Mire<sup>3,#</sup>, Shahin Ranjbar<sup>4,#</sup>,  
7 Adam J. Hume<sup>5,6</sup>, Jessie Huang<sup>7,8</sup>, Nicholas A. Crossland<sup>5,9</sup>, Kris M White<sup>1,2</sup>, Manon Laporte<sup>1,2</sup>,  
8 Thomas Kehrer<sup>1,2</sup>, Viraga Haridas<sup>4</sup>, Elena Moreno<sup>1,2</sup>, Aya Nambu<sup>4</sup>, Sonia Jangra<sup>1,2</sup>,  
9 Anastasija Cupic<sup>1,2</sup>, Marion Dejoze<sup>10</sup>, Kristine A. Abo<sup>7,8</sup>, Anna E. Tseng<sup>5,9</sup>,  
10 Rhiannon B. Werder<sup>7,8</sup>, Raveen Rathnasinghe<sup>1,2</sup>, Tinaye Mutetwa<sup>1</sup>, Irene Ramos<sup>1</sup>,  
11 Julio Sainz de Aja<sup>11</sup>, Carolina Garcia de Alba Rivas<sup>11</sup>, Michael Schotsaert<sup>1,2</sup>, Ronald B. Corley<sup>5,9</sup>,  
12 James V. Falvo<sup>4</sup>, Ana Fernandez-Sesma<sup>1</sup>, Carla Kim<sup>11,12,13</sup>, Jean-François Rossignol<sup>14</sup>,  
13 Andrew A. Wilson<sup>7,8</sup>, Thomas Zwaka<sup>10</sup>, Darrell N. Kotton<sup>7,8,9</sup>, Elke Mühlberger<sup>5,6</sup>,  
14 Adolfo García-Sastre<sup>1,2,15,16,17</sup>, §Anne E. Goldfeld<sup>4,18,19</sup>  
15

16 <sup>1</sup>Department of Microbiology, Icahn School of Medicine at Mount Sinai, New York, NY, USA; <sup>2</sup>Global Health  
17 Emerging Pathogens Institute, Icahn School of Medicine at Mount Sinai, New York, NY, USA; <sup>3</sup>University  
18 of Texas Medical Branch, Galveston, TX, USA; <sup>4</sup>Program in Cellular and Molecular Medicine, Boston  
19 Children's Hospital, Harvard Medical School, Boston, MA, USA; <sup>5</sup>National Emerging Infectious Diseases  
20 Laboratories, Boston University, Boston, MA, USA <sup>6</sup>Department of Microbiology, Boston University School  
21 of Medicine, Boston, MA, USA; <sup>7</sup>Center for Regenerative Medicine of Boston University and Boston Medical  
22 Center, Boston, MA, USA; <sup>8</sup>The Pulmonary Center and Department of Medicine, Boston University School  
23 of Medicine, Boston, MA, USA; <sup>9</sup>Department of Pathology and Laboratory Medicine, Boston University  
24 School of Medicine, Boston, MA, USA; <sup>10</sup>Cell, Developmental & Regenerative Biology, Icahn School of  
25 Medicine at Mount Sinai; New York, NY, USA; <sup>11</sup>Stem Cell Program, Boston Children's Hospital, Boston,  
26 MA, USA; <sup>12</sup>Harvard Stem Cell Institute, Cambridge, Massachusetts; <sup>13</sup>Department of Genetics, Harvard  
27 Medical School, Boston, MA, USA; <sup>14</sup>Romark Institute for Medical Research, Tampa, FL, USA; <sup>15</sup>Department  
28 of Medicine, Division of Infectious Diseases, Icahn School of Medicine at Mount Sinai, New York, NY, USA;  
29 <sup>16</sup>Tisch Cancer Institute, Icahn School of Medicine at Mount Sinai, New York, NY, USA; <sup>17</sup>Department of  
30 Pathology, Molecular and Cell-Based Medicine, Icahn School of Medicine at Mount Sinai, New York, NY,  
31 USA; <sup>18</sup>Division of Infectious Diseases, Department of Medicine, Brigham and Women's Hospital, Harvard  
32 Medical School, Boston, MA, USA; <sup>19</sup>Department of Immunology and Infectious Diseases, Harvard T.C.  
33 Chan School of Public Health, Boston, MA, USA.  
34  
35

36 #These authors contributed equally

37 §To whom correspondence should be addressed:

38 Lisa Miorin: [lisa.miorin@mssm.edu](mailto:lisa.miorin@mssm.edu); Anne E. Goldfeld: [anne.goldfeld@childrens.harvard.edu](mailto:anne.goldfeld@childrens.harvard.edu)  
39

40 **Abstract**

41

42 A well-tolerated and cost-effective oral drug that blocks SARS-CoV-2 growth and  
43 dissemination would be a major advance in the global effort to reduce COVID-19 morbidity and  
44 mortality. Here, we show that the oral FDA-approved drug nitazoxanide (NTZ) significantly inhibits  
45 SARS-CoV-2 viral replication and infection in different primate and human cell models including  
46 stem cell-derived human alveolar epithelial type 2 cells. Furthermore, NTZ synergizes with  
47 remdesivir, and it broadly inhibits growth of SARS-CoV-2 variants B.1.351 (beta), P.1 (gamma),  
48 and B.1617.2 (delta) and viral syncytia formation driven by their spike proteins. Strikingly, oral  
49 NTZ treatment of Syrian hamsters significantly inhibits SARS-CoV-2-driven weight loss,  
50 inflammation, and viral dissemination and syncytia formation in the lungs. These studies show  
51 that NTZ is a novel host-directed therapeutic that broadly inhibits SARS-CoV-2 dissemination and  
52 pathogenesis in human and hamster physiological models, which supports further testing and  
53 optimization of NTZ-based therapy for SARS-CoV-2 infection alone and in combination with  
54 antiviral drugs.

55

56

57

58

59

60

61

62 **Keywords:** SARS-CoV-2; COVID-19; Delta variant; FDA-approved oral drug; Nitazoxanide, NTZ;  
63 viral syncytia; Spike; type-I interferon; host-directed therapeutic; alveolar epithelial type 2 cells;  
64 Syrian hamsters; imaging flow cytometry.

65

## 66 Introduction

67

68 The ongoing COVID-19 pandemic has resulted in more than 396 million cases and 5.7  
69 million deaths worldwide (Dong et al., 2020). An easily deployable, well-tolerated, inexpensive,  
70 orally active drug that is safe in adults and children to treat or inhibit disease progression would  
71 be a significant advance in the fight against COVID-19. Nitazoxanide (NTZ) is an FDA-approved  
72 and well-tolerated oral therapy originally developed for parasitic infection that has been used for  
73 treatment of *Giardia*- and *Cryptosporidium*-associated diarrhea in millions of adults and children  
74 (Dumbo et al., 1997; Hussar, 2004; Rossignol et al., 1998). In addition, both NTZ and its  
75 circulating metabolite tizoxanide (TIZ) have been shown to inhibit a diverse array of viruses,  
76 including human coronaviruses *in vitro* (Rossignol, 2014; Wang et al., 2020).

77 Our previous studies showed that NTZ functions as a host-directed therapeutic (HDT) that  
78 inhibits Ebola virus (EBOV) and vesicular stomatitis virus (VSV) by amplifying host cytosolic RNA  
79 sensing and type I interferon (IFN) signaling pathways and by inducing the cell stress and antiviral  
80 phosphatase GADD34 (Jasenosky et al., 2019). These studies, which showed that NTZ creates  
81 a broad “antiviral milieu” capable of overcoming virus-specific immune evasion strategies  
82 (Jasenosky et al., 2019; Ranjbar et al., 2019), led us to test NTZ’s ability to inhibit severe acute  
83 respiratory syndrome coronavirus 2 (SARS-CoV-2) replication and pathogenesis in  
84 physiologically relevant preclinical models of infection.

85 Here, we show that NTZ significantly inhibits SARS-CoV-2 replication in human and  
86 primate cell lines including human alveolar epithelial type 2 cells (iAT2s) derived from induced  
87 pluripotent stem cells (iPSCs). We also show that NTZ broadly inhibits replication of SARS-CoV-  
88 2 variants of concern and SARS-CoV-2 Spike protein-induced syncytia formation. Furthermore,  
89 when administered in combination with the antiviral remdesivir (RDV), an intravenous drug that  
90 directly targets viral replication via inhibition of the RNA-dependent RNA polymerase (RdRp)  
91 (Pruijssers et al., 2020), NTZ synergistically inhibits SARS-CoV-2 growth.

92           Importantly, our study validates the potential of NTZ as a repurposed HDT against COVID-  
93 19 in the Syrian hamster infection model. As compared to vehicle-treated infected hamsters, oral  
94 administration of NTZ twice-daily resulted in a significant decrease in SARS-CoV-2 morbidity as  
95 characterized by both decreased weight loss and lung pathology with dramatic reduction of  
96 SARS-CoV-2 viral spike dissemination and syncytia formation. Altogether, these results provide  
97 impetus to test and optimize an NTZ-based therapy especially in combination with other promising  
98 orally bioavailable antiviral drugs that directly target viral replication.



99 **Results**

100

101 **NTZ and TIZ inhibit SARS-CoV-2 infection in Vero E6 cells in a dose-dependent manner**

102 To determine whether NTZ and its active metabolite TIZ inhibit SARS-CoV-2 replication,  
103 we first performed antiviral assays in Vero E6 cells, which are well known to support productive  
104 infection with SARS-CoV-2 (Matsuyama et al., 2020) (Suppl. Fig. 1A). Vero E6 cells were thus  
105 exposed to increasing concentrations of NTZ, TIZ, or vehicle (DMSO) for 4 hrs before infection  
106 with SARS-CoV-2 (isolate USA-WA1/2020) at MOI of 0.025 (see schema in Fig. 1A), and as a  
107 positive control, cells were treated in parallel with different concentrations of the RdRp inhibitor  
108 RDV. After 48 hrs, the percent of infection across the different conditions was determined by  
109 immunostaining for the viral nucleoprotein (N) using a Celigo (Nexcelcom) imaging cytometer and  
110 was used to calculate the 50% inhibitory concentration ( $IC_{50}$ ) of NTZ as previously described  
111 (Alwan et al., 1988). The cytotoxicity of NTZ, TIZ, and RDV was evaluated by performing MTT  
112 assays on uninfected cells treated with the same compound dilutions in parallel with the antiviral  
113 assay. We found that NTZ and TIZ possess strong antiviral activity against SARS-CoV-2 in Vero  
114 E6 cells, with  $IC_{50}$ s of 4.04  $\mu$ M and 3.62  $\mu$ M, respectively, without exhibiting cytotoxicity (Fig. 1B).

115 Using a NeonGreen (NG) expressing SARS-CoV-2 (USA-WA1/2020) recombinant virus  
116 (NG-SARS-CoV-2) (Xie et al., 2020), the effect of NTZ on SARS-CoV-2 replication was next  
117 assessed by FACS and by imaging flow cytometry using the ImageStream platform (Doan et al.,  
118 2018; Haridas et al., 2017; Ranjbar et al., 2019). Cells were pre-treated with 5 or 10  $\mu$ M NTZ for  
119 4 hrs and then infected with NG-SARS-CoV-2 at two different MOIs (0.025 and 0.25) for 48 hrs.  
120 In agreement with our findings using the USA-WA1/2020 strain in the antiviral assays above (Fig.  
121 1B), we observed dose-dependent NTZ inhibition of the percentage of NG-SARS-CoV-2-infected  
122 cells at both MOIs by FACS analysis (Fig. 1C-i).

123           Imaging flow cytometry allows for high-throughput evaluation of SARS-CoV-2 infection at  
124 the single cell level (Doan et al., 2018; Haridas et al., 2017; Ranjbar et al., 2019) and quantification  
125 of intracellular fluorescence produced by NG-labeled SARS-CoV-2. Using the ImageStream  
126 platform, we thus next acquired approximately 3000 cells from vehicle- and NTZ-treated NG-  
127 SARS-CoV-2-infected cultures and measured NG fluorescence in each experimental condition.  
128 NTZ pre-treatment for 4 hrs prior to SARS-CoV-2 infection resulted in significant inhibition of NG  
129 expression at both concentrations of NTZ (5 or 10  $\mu$ M) and at both MOIs (0.025 and 0.25)  
130 ( $p < 0.001$  for each comparison) after 48 hrs (Fig. 1C-ii). We note that representative images of  
131 cells that had pixel values at the median level of each condition (marked by the red bar) are  
132 displayed showing the NTZ-dependent decreased fluorescence in the infected cells (Fig. 1C-iii).  
133 Strikingly, we also observed a significant decrease of the number of infected cells at both NTZ  
134 concentrations and both MOIs tested (Fig. 1C-ii) ( $p < 0.0001$ ) for each comparison.

135           Given the robust antiviral activity of NTZ in Vero E6 cells, and based on their different  
136 mechanisms of action, we next assessed NTZ's ability to synergize with RDV, which was a  
137 standard of care drug treatment to shorten time of COVID-19 recovery (Beigel et al., 2020). To  
138 test this hypothesis, we performed combination assays in Vero E6 cells and found that NTZ  
139 significantly increases the ability of RDV to inhibit viral infection (Fig. 1D). The results of the  
140 combination assay were then further analyzed using SynergyFinder to generate a synergy  
141 landscape and combination score by the Loewe model (Fig. 1E) (Ianevski et al., 2020). In this  
142 model, a synergistic interaction between drugs is indicated by a score greater than +10, while an  
143 additive interaction has a score between -10 and +10, and an antagonistic interaction has a score  
144 lower than -10. Notably, the landscape for the interaction of RDV with NTZ shows synergy scores  
145 greater than +10 at low NTZ concentrations (6.26  $\mu$ M) (Fig. 1E), denoting moderate synergy of  
146 the two drugs in the inhibition of SARS-CoV-2 growth. These data are consistent with a study  
147 showing that NTZ synergistically enhances the ability of RDV to reduce cytopathic effect (CPE)

148 (Bobrowski et al., 2021). All together, these data show that in Vero E6 cells NTZ robustly inhibits  
149 SARS-CoV-2 replication and forms an inhibitory synergistic compound pair with RDV.

150

### 151 **Validation of NTZ antiviral activity in human cell lines**

152 We next evaluated the ability of NTZ to inhibit SARS-CoV-2 replication in the human cell  
153 line A549 transduced with angiotensin-converting enzyme 2 (Ace2). After confirming that the  
154 Ace2-A549 cells support SARS-CoV-2 replication (Suppl. Fig. 1B), we pre-treated these cells with  
155 increasing concentrations of NTZ, TIZ, RDV, or vehicle (DMSO) for 4 hrs before infection with  
156 SARS-CoV-2 (USA-WA1/2020) at an MOI of 0.1. At 48 hrs post-infection, the IC<sub>50</sub> and cytotoxicity  
157 of each compound was determined as described above. We observed strong antiviral activity of  
158 NTZ (IC<sub>50</sub> 1.695 μM) and TIZ (IC<sub>50</sub> 1.322 μM) against SARS-CoV-2 infection in Ace2-A549 with  
159 no cytotoxicity (Fig. 2A). In addition, we also evaluated the effect of NTZ on SARS-CoV-2  
160 replication in another human cell line, Ace2-expressing HEK293T cells (Ace2-HEK293T) (Miorin  
161 et al., 2020). NTZ similarly inhibited SARS-CoV-2 replication in a dose-dependent manner in  
162 Ace2-HEK293T with an IC<sub>50</sub> of 2.2 μM (Suppl. Fig. 2).

163 We next pretreated Ace2-A549 cells with 5 or 10 μM NTZ for 4 hrs followed by infection  
164 with NG-SARS-CoV-2 (MOI 0.01 and 0.05) for 48 hrs. Analysis by FACS showed that NTZ  
165 reduced the percentage of NG-SARS-CoV-2-infected Ace2-A549 cells at both NTZ  
166 concentrations and both MOIs (Fig. 2B-i). Furthermore, 5 μM NTZ significantly reduced both the  
167 median levels of NG-SARS-CoV2 fluorescence in infected cells and the number of infected cells  
168 (Fig. 2B-ii). Images of individual Ace2-A549 cells with pixel numbers that fell at the median level  
169 of pixels for the population are displayed in Figure 2B-iii.

170 Interestingly, the IC<sub>50</sub> for NTZ in both human cell lines (Ace2-A549: 1.695 μM; Ace2-  
171 HEK293T: 2.2 μM) were lower than the IC<sub>50</sub> in Vero E6 cells (4.444 μM). Notably, Vero cells are  
172 deficient in type I IFN production (Emeny and Morgan, 1979) due to a deletion on chromosome

173 12 resulting in loss of the type I IFN gene cluster (Osada et al., 2014). To interrogate whether  
174 signaling through the type I IFN receptor (IFNAR) plays a role in NTZ's ability to inhibit SARS-  
175 CoV-2 infection in human cells, we compared NTZ antiviral activity in wild-type and IFNAR knock-  
176 out (KO) Ace2-A549 cells. To verify that IFNAR signaling was abrogated in the knock-out cells,  
177 we showed that the IFN-dependent phosphorylation of STAT1 and STAT2 (Suppl. Fig. 3A) and  
178 transcription of the interferon stimulated gene (ISG) IFITM3 (Suppl. Fig. 3B) were both abolished  
179 in the IFNAR-KO Ace2-A549 cells as expected. In addition, we confirmed that Ace2 expression  
180 was equivalent in the two cell lines (Suppl. Fig. 3A).

181 The wild-type and IFNAR-KO Ace2-A549 cells were then treated with 10  $\mu$ M NTZ or with  
182 DMSO for 4 hrs followed by infection with NG-SARS-CoV-2 at an MOI of 0.1 or 0.01 for 48 hrs.  
183 Notably, IFNAR-KO Ace2-A549 cells showed a significant increase in the median level of NG  
184 fluorescence and also in the numbers of SARS-CoV-2-infected cells at both NTZ concentrations  
185 and MOIs tested (Fig. 2C-i). Thus, IFNAR signaling restricts SARS-CoV-2 growth and infection in  
186 Ace2-A549 cells. Interestingly, NTZ significantly inhibited both the level of intracellular NG-SARS-  
187 CoV-2 fluorescence and the number of infected cells in both WT and IFNAR-KO Ace2-A549 cells,  
188 however its ability to inhibit SARS-CoV-2 replication and the number of infected cells was reduced  
189 in the IFNAR-KO cells (Fig. 2C-i). Indeed, the median NG fluorescence and the number of infected  
190 cells remained significantly higher in the NTZ-treated IFNAR-KO cells compared to the NTZ-  
191 treated parental Ace2-A549 cells at both MOIs. Taken together, these results show: (i) IFNAR  
192 signaling restricts SARS-CoV-2 replication; (ii) NTZ can inhibit SARS-CoV-2 in the absence of  
193 IFNAR signaling; and (iii) IFNAR signaling is required for optimal NTZ inhibition of SARS-CoV-2  
194 growth and infection.

195

196 **NTZ inhibits SARS-CoV-2 replication in physiologic human pluripotent stem cell-derived**  
197 **cell models**

198 SARS-CoV-2 targets and infects ciliated airway epithelial cells and type 2 pneumocytes in  
199 alveolar regions of the lung (Hou et al., 2020). To evaluate the ability of NTZ to restrict SARS-  
200 CoV-2 replication in a physiologically relevant cell type, we used two independently derived  
201 human pneumocyte *in vitro* models that are generated by the directed differentiation of human  
202 pluripotent stem cells (PSCs), the H9 embryonic stem cell line and SPC2-ST-B2 induced  
203 pluripotent stem cells (iPSCs) (Hurley et al., 2020). Both H9-derived pneumocyte-like cells (Riva  
204 et al., 2020) and the iPSC-derived alveolar epithelial type 2 cells (iAT2s) (Huang et al., 2020)  
205 have previously been shown to support SARS-CoV-2 replication. Strikingly, pre-treatment of H9-  
206 pneumocytes (Fig. 3A) or iAT2 cells (Fig. 3B) with NTZ for 4 hrs prior to infection with SARS-CoV-  
207 2 (isolate USA-WA1/2020) resulted in a significant dose-dependent inhibition of virus replication  
208 without significant cytotoxicity. In addition, NTZ's antiviral activity against SARS-CoV-2 in iAT2  
209 cells was also validated using the NG-SARS-CoV-2 recombinant virus and the ImageStream  
210 platform. We found that NTZ significantly inhibited NG-SARS-CoV-2 fluorescence ( $p=0.026$ ) and  
211 the number of NG-SARS-CoV-2 infected cells in the culture ( $p<0.0001$ ) (Fig. 3C). We note that  
212 the PSCs from which H9 and iAT2 cells are derived are from two unrelated individuals. Thus, our  
213 findings are not specific to an individual and indicate that NTZ inhibits both SARS-CoV-2  
214 replication and *de novo* infection of bystander cells in human alveolar epithelial cell cultures that  
215 reflect physiological infection.

216

### 217 **NTZ inhibits virus replication of SARS-CoV-2 variants of concern**

218 Different SARS-CoV-2 variants have contributed to successive waves of the COVID-19  
219 epidemic due to their increased transmissibility and virulence, as well as the waning of vaccine-  
220 mediated immunity (Harvey et al., 2021). To determine NTZ's activity against three of the recently  
221 emerged variants of concern (<https://www.who.int/en/activities/tracking-SARS-CoV-2-variants/>),  
222 we treated Vero E6 cells with NTZ for 4 hrs and then infected them with SARS-CoV-2 beta  
223 (B.1.351), gamma (P.1), or delta (B.1617.2). As a control, cells were also infected with the original

224 SARS-CoV-2 WA1 strain used in our studies described above. NTZ strongly inhibited the  
225 replication of each variant tested similar to its ability to inhibit SARS-CoV-2 WA1 (Fig. 4A). Thus,  
226 NTZ is able to inhibit different viral variants with divergent spike proteins that are associated with  
227 increased virulence and transmissibility.

228 Intriguingly, high-throughput screening of over 3,000 FDA/EMA-approved drugs recently  
229 identified niclosamide, which is structurally similar to NTZ (Stachulski et al., 2021), as an effective  
230 inhibitor of spike-induced syncytia formation (Braga et al., 2021). To test the hypothesis that NTZ  
231 restricts SARS-CoV-2 dissemination by directly inhibiting spike-mediated fusion, we  
232 overexpressed spike protein from SARS-CoV-2 (USA-WA1/2020) and SARS-CoV-2 variants  
233 alpha (B.1.1.7), beta (B.1.351), gamma (P.1), and delta (B.1617.2) in Vero-TMPRSS2 cells. Four  
234 hours after transfection, 15  $\mu$ M NTZ or vehicle (DMSO) was added to the cultures and 24 hrs later  
235 cells were fixed to evaluate syncytia formation. NTZ broadly and significantly inhibited syncytia  
236 formation induced by overexpression of spike from the USA-WA1/2020 strain and from each  
237 variant tested in this assay. Consistent with their increased virulence compared to the USA-  
238 WA1/2020 strain, the four variants exhibited significantly higher levels of syncytia formation (Fig.  
239 4B), concordant with a recent report (Escalera et al., 2021). These data indicate that NTZ targets  
240 a cellular process mediating spike-induced cell-cell fusion that is not significantly affected by the  
241 spike mutations in the variants tested.

242

### 243 **Oral administration of NTZ significantly reduces SARS-CoV-2 replication and disease** 244 **pathogenesis in Syrian hamsters**

245 Given the promising antiviral activity of NTZ *in vitro*, we next evaluated its ability to inhibit  
246 SARS-CoV-2 infection and disease *in vivo*. We chose the Syrian hamster model of SARS-CoV-2  
247 infection, where animals develop severe pneumonia and clinical outcomes (i.e., peak weight loss  
248 around 5 days and complete resolution by 14 days post infection), which are predictable (Chan  
249 et al., 2020; Imai et al., 2020; Sia et al., 2020). We used a new extended-release formulation

250 of NTZ (NT-300) currently under phase III evaluation (Rossignol et al., 2021), which reaches  
251 peak levels 6-8 hrs after ingestion (Haffizulla et al., 2014).

252 Hamsters were split into 3 groups (12 animals/group): (i) naïve (no infection and no  
253 treatment); (ii) infected with SARS-CoV-2 (300pfu) with vehicle (PBS) treatment delivered  
254 twice daily (BID) to control for hamster manipulation during oral gavage; (iii) infected with  
255 SARS-CoV-2 (300 pfu) and with NTZ (300 mg/kg/day) delivered BID by oral gavage. The first  
256 NTZ or vehicle dose was administered 6 hours prior to SARS-CoV-2 infection. The second  
257 dose was given 6 hours after infection and then NTZ or vehicle was dosed every 12 hours to  
258 complete 5 days of therapy. Daily weights were recorded in the 3 groups from the day of  
259 infection up until 14 days post infection (dpi). We found significant protection ( $p=0.025$ ) from  
260 weight loss at 5 dpi in the NTZ-treated animals compared to animals who were treated with  
261 PBS and observed strong trends of protection at 4 dpi ( $p=0.056$ ) and 6 dpi ( $p=0.80$ ) (Fig. 5A).  
262 In addition, animals from each group were sacrificed at 2, 5, and 14 dpi and lungs were  
263 collected and processed for viral titer determination and histopathological evaluation. NTZ-  
264 treated SARS-CoV-2-infected animals displayed lower viral titers in lung biopsies as  
265 compared to mock treated SARS-CoV-2-infected animals ( $p=0.057$ ) at 2 dpi (Fig. 5B).

266 In a complementary approach, we used immunohistochemistry targeting the SARS-CoV-  
267 2 Spike protein to visualize and measure the dissemination of infection within the lung. In addition,  
268 we quantified the levels of Spike protein expression in the lung by calculating the positive pixels  
269 of SARS-CoV-2 Spike immunoreactivity per micron of tissue (Fig. 5C and Suppl. Table 2). As  
270 shown in the graph in Fig. 5C, SARS-CoV-2 Spike protein expression was only detected at 2 dpi,  
271 irrespective of the cohort, and was significantly less in the NTZ-treated SARS-CoV-2-infected  
272 group ( $p=0.0496$ ) as compared to the vehicle-treated SARS-CoV-2-infected cohort. This is  
273 consistent with the decline in infectious virus particles we observed at 2 dpi in the NTZ-treated  
274 animals (Fig. 5B).



275           While SARS-CoV-2 Spike was mostly located in bronchiole epithelium in both the vehicle-  
276 and NTZ-treated infected hamsters at 2 dpi, in the SARS-CoV-2-vehicle treatment group, Spike  
277 was more plentiful, with near-complete circumferential involvement of bronchioles that routinely  
278 disseminated to smaller distal airways with sporadic involvement of cuboidal pneumocytes  
279 interpreted to represent alveolar type 2 pneumocytes, and Spike was evident in the interstitial  
280 compartment of the lungs. By contrast, in the NTZ-treated group, almost all the SARS-CoV-2  
281 Spike was located in the proximal airways with a more localized and segmental distribution, and  
282 it was not detected in the interstitial compartment in lungs from NTZ-treated animals (see  
283 magnification of images in Fig. 5C). By 5 dpi, there was minimal residual SARS-CoV-2 Spike  
284 observed in both the NTZ- and vehicle-treated SARS-CoV-2-infected groups, which was almost  
285 exclusively restricted to sporadic individual bronchiole epithelial cells. No SARS-CoV-2 Spike  
286 protein was detected in any cohorts by 14 dpi (data not shown).

287

### 288 **NTZ improves SARS-CoV-2-driven lung pathology in Syrian hamsters**

289           Lung histopathology was also examined across the 3 experimental cohorts. Individual lung  
290 ordinal scores from 1-3 were determined for all animals to quantify severity of infection (Fig. 6B  
291 and Suppl. Table 2), and representative lung H&E images are shown (Fig. 6A and Suppl. Fig. 5).  
292 At 2 dpi the interstitial score was significantly decreased ( $p=0.026$ ) in the NTZ-treated animals  
293 compared to the SARS-CoV-2-infected vehicle-treated animals (Fig. 6B). This was reflected by  
294 the absence of, or minimal, lymphohistiocytic and neutrophilic alveolar and/or septal infiltrate in  
295 the group of NTZ-treated animals (Fig. 6A). While at 2 dpi the airway score for NTZ- vs. vehicle-  
296 treated animals did not reach significance (Fig. 6C), three of the four NTZ-treated animals  
297 exhibited absence of discernible bronchiole epithelial pathology like that observed in naïve  
298 animals, with a dramatic decline in neutrophilic and histiocytic luminal infiltrate compared to  
299 vehicle-treated animals in the one animal that did display airway injury (Fig. 6A). Histologically,  
300 this was reflected by less severe and more segmental necrotizing bronchiolitis (see magnified



301 image in Suppl. Fig. 5). Blood vessel scores for NTZ- vs. vehicle-treated animals at 2 dpi also did  
302 not reach significance, however again we note that three of the four NTZ-treated animals exhibited  
303 an absence of any detectable perivascular infiltrate similar to naïve animals.

304 NTZ therapy was halted at 4 dpi with 5 days of total treatment. At 5 dpi, lung pathology  
305 scores were ubiquitously severe, with no clear distinction between the cohorts in any of the  
306 anatomical compartments examined (Figs. 6A and 6B). The precise mechanism for the uniform  
307 severity observed across the SARS-CoV-2-infected animals +/- NTZ at 5 dpi is unknown. We note  
308 that this observation mirrors findings described in an intramuscular DNA vaccine platform  
309 encoding SARS-CoV-2 Spike protein, which showed immunologic correlates of protection and a  
310 decrease in viral load in Syrian hamsters, but no clear mitigation in lung pathology at 4 dpi  
311 compared to positive controls (Leventhal et al., 2021).

312 At 14 dpi, no residual pathology was evident in the airways and the severity of interstitial  
313 pathology was minimal to mild in all cohorts (Fig. 6A), which was reflected by small residual  
314 clusters of AT2 hyperplasia with minimal histiocytic and neutrophilic infiltrate (Suppl. Fig. 5) with  
315 no significant difference in interstitial scores between the groups (Fig. 6B). Notably, blood vessel  
316 scores at 14 dpi were significantly decreased ( $p=0.012$ ) in the NTZ-treated group compared to  
317 the vehicle-treated group (Fig. 6B), where all four NTZ-treated animals had a clear decrease in  
318 residual perivascular lymphohistiocytic infiltrates at 14 dpi compared to vehicle-treated animals  
319 (Fig. 6B and Suppl. Fig. 5).

320 We next evaluated H&E lung images to identify potential differences in the levels of SARS-  
321 CoV-2-induced syncytia between vehicle- and NTZ-treated hamsters. Strikingly, we observed  
322 multiple, often neighboring, syncytial epithelial cells in lungs from all the vehicle-treated SARS-  
323 CoV-2-infected animals at 5 dpi (Fig. 6C), which occurred exclusively in areas of bronchiole  
324 hyperplasia. By contrast, syncytia formation was rarely observed in the NTZ-treated group, and  
325 when observed consisted of a single isolated syncytium within an area of bronchiole hyperplasia  
326 (Fig. 6C). Notably, syncytia were not observed at either 2 or 14 dpi in any SARS-CoV-2-infected

327 animals irrespective of treatment group; importantly, syncytia were never observed in naïve  
328 animals.

329 **DISCUSSION**

330

331 A critical objective in the global effort to significantly reduce COVID-19 morbidity and  
332 mortality is the development of a scalable, well-tolerated, and cost-effective oral therapeutic or  
333 cocktail that can be deployed in resource-limited settings as well as in the global north. Here, we  
334 provide *in vitro* and *in vivo* data in physiological models of infection showing that NTZ significantly  
335 restricts the replication of different SARS-CoV-2 variants of concern *in vitro*, and inhibits virus-  
336 induced morbidity, inflammation, and viral dissemination *in vivo* in the Syrian hamster model.  
337 Together, these studies suggest that NTZ could have a potential role as an oral therapeutic in the  
338 treatment of COVID-19 and its long-term complications or as a prophylactic in high-risk  
339 exposures.

340 Multiple host processes have been implicated in the ability of NTZ to inhibit viral  
341 replication. In this respect, we previously showed that NTZ inhibition of EBOV replication is  
342 significantly impaired in cells deficient in the RNA sensors PKR and RIG-I (Jasenosky et al.,  
343 2019). EBOV viral protein 35 (VP35), a protein produced early in infection, binds to dsRNA  
344 replicative intermediates shielding EBOV from cytoplasmic sensors including RIG-I and PKR  
345 (Cardenas et al., 2006; Feng et al., 2007; Leung et al., 2009; Leung et al., 2010; Schumann et  
346 al., 2009), and a second EBOV protein, viral protein 24 (VP24), blocks the activation and nuclear  
347 accumulation of STAT1 and inhibits IFN-responsive gene transcription (Reid et al., 2006; Reid et  
348 al., 2007; Xu et al., 2014; Zhang et al., 2012). Thus, NTZ, at least in part, overrides EBOV  
349 mechanisms of viral innate immune evasion via its ability to amplify PKR- and RIG-I-dependent  
350 RNA sensing (Jasenosky et al., 2019). By contrast, the ability of NTZ to inhibit VSV infection is  
351 impaired in GADD34- and RIG-I-deficient cells, but not in PKR-deficient cells (Jasenosky et al.,  
352 2019). Thus, NTZ has the ability to inhibit viral replication by broadly amplifying RNA sensing  
353 pathways, but the specific host factors mediating its antiviral activity may differ during infection  
354 with different viruses (Jasenosky et al., 2019).

355 Here, we find that the antiviral activity of NTZ is enhanced by functional type-I IFN  
356 signaling. However, in the context of SARS-CoV-2 infection, NTZ was still able to significantly  
357 inhibit viral replication in type-I IFN-deficient Vero E6 cells and IFNAR-KO Ace2-A549 cells. It will  
358 be important in the future to assess whether the induction of type III IFN genes and the expression  
359 of a specific set of IFN-independent ISGs are contributing to this residual NTZ activity. Recent  
360 studies have shown that MDA5 and LGP2 are the major pattern recognition receptors involved in  
361 SARS-CoV-2 restriction (Sampaio et al., 2021; Yin et al., 2021). We previously showed that NTZ  
362 enhances the transcription and the signaling activity of MDA5 (Jasenosky et al., 2019; Ranjbar et  
363 al., 2019). However, the role of the MDA5-LGP2 sensing pathway in the antiviral activity of NTZ  
364 during SARS-CoV-2 infection remains to be defined and is currently a subject of investigation.

365 Interestingly, NTZ was previously shown to effectively inhibit the replication of influenza  
366 and parainfluenza viruses *in vitro* by impairing maturation and intracellular trafficking of their  
367 fusion glycoproteins (Piacentini et al., 2018; Rossignol et al., 2009). Furthermore, NTZ and  
368 niclosamide interact with TMEM family members TMEM16A and 16F, which are calcium-activated  
369 ion channels and lipid scramblases responsible for the exposure of phosphatidylserine on the cell  
370 surface (Braga et al., 2021; Caputo et al., 2008; Schroeder et al., 2008; Yang et al., 2008). Both  
371 drugs can function as TMEM16A antagonists, which attenuate bronchoconstriction (Miner et al.,  
372 2019). Moreover, niclosamide inhibits SARS-CoV-2 Spike-driven syncytia formation by  
373 antagonizing the activity of TMEM16F (Braga et al., 2021). Our results showing that NTZ broadly  
374 inhibits syncytia formation driven by SARS-CoV-2 Spike from major variants of concern are  
375 consistent with these studies and further broaden NTZ's mechanism of action in viral infection.  
376 This finding is also consistent with the significant reduction of the number of SARS-CoV-2-infected  
377 cells in NTZ-treated cultures, and with the ability of NTZ to synergize with RDV given their  
378 independent mechanisms of action. It remains to be demonstrated whether or not NTZ alters  
379 spike maturation and intracellular trafficking, or if NTZ regulates the activity of members of the  
380 TMEM16 family in the context of infection.

381 Strikingly, oral administration of NTZ to SARS-CoV-2-infected Syrian hamsters results in  
382 a significant reduction of virus-induced weight loss and lung viral load. Consistently, NTZ  
383 treatment clearly affected Spike expression levels and distribution patterns within the lungs from  
384 infected hamsters. Furthermore, animals that had been treated with NTZ also exhibited a  
385 reduction of viral syncytial cells in their lungs. Whether this is directly due to the ability of NTZ to  
386 inhibit syncytia formation or is a consequence of the decreased viral load and spike expression is  
387 not yet known. Importantly, in addition to the significant decrease in spike dissemination, we also  
388 observed a dramatic decrease in bronchiolar epithelial degeneration/necrosis with reduced  
389 recruitment of inflammatory cells to bronchiolar lumina and lung interstitia at 2 dpi and to  
390 perivascular compartments at 14 dpi when hamsters who received NTZ recovered from infection.  
391 These results suggest that NTZ may inhibit injury to permissive cell types and ameliorate  
392 subsequent recruitment of inflammatory cells that could cause inflammatory complications of  
393 SARS-CoV-2 infection.

394 Intriguingly, an initial trial of NTZ treatment in patients (n=50) with moderate COVID-19  
395 disease showed that 5 days of treatment was associated with decreased inflammatory  
396 biomarkers, faster SARS-CoV-2 PCR negativity, and decreased time to hospital discharge (Blum  
397 et al., 2021). Furthermore, a randomized controlled trial (RCT) (n=379) of 5 days of placebo or  
398 NTZ treatment for mild or moderate COVID-19 using the extended-release formulation of NTZ  
399 (NT-300) was associated with an 85% reduction in progression to severe illness (Rossignol et al.,  
400 2021). In both trials NTZ was well tolerated and there were no major adverse events. Here, our  
401 *in vivo* studies in the hamster model demonstrating that NTZ significantly reduces morbidity,  
402 inflammation, and viral dissemination are consistent with these studies.

403 Moreover, our demonstration that NTZ significantly inhibits SARS-CoV-2 growth,  
404 synergizes with RDV, and significantly inhibits different SARS-CoV-2 variants of concern including  
405 the more pathogenic delta (B.1617.2) variant, suggests that combining NTZ with another orally  
406 available antiviral could form a promising cocktail to treat SARS-CoV-2 infection. In this case,

407 addition of NTZ to new oral antivirals shown to reduce hospitalization and death, such as  
408 molnupiravir or Paxlovid (Jayk Bernal et al., 2021; Ledford, 2021), or with intravenously delivered  
409 RDV, which has recently been shown to significantly decrease progression of disease in  
410 individuals at high risk (Gottlieb et al., 2021), could potentially mitigate viral spread in organs,  
411 inflammatory complications, and disease in high-risk exposures including immunosuppressed  
412 individuals where viremia is persistent and difficult to treat.

413 Finally, NTZ has a long safety profile in adults and children, has a pediatric syrup  
414 formulation, and is well-tolerated in HIV-infected individuals (Rosignol, 2014; Wang et al., 2020).  
415 An NTZ-based combination cocktail based on synergy could therefore potentially lower the  
416 dosage requirement of expensive and scarce new antiviral oral drugs that have a shorter history  
417 of safety data; this could be especially helpful in treatment of children and in immunosuppressed  
418 HIV-infected individuals. Furthermore, the oral formulation, inexpensive cost, and wide global use  
419 of NTZ make it easily deployable and accessible in resource-constrained settings.

## 420 MATERIALS AND METHODS

421

### 422 Cell lines

423 Vero E6 (ATCC, CRL-1586), A549 (ATCC, CRM-CCL-185)-derived, and HEK293T  
424 (ATCC, CRL-3216)-derived cell lines were maintained in DMEM (Corning) supplemented with  
425 10% FBS (Peak Serum) and Penicillin/Streptomycin (Corning) at 37°C and 5% CO<sub>2</sub>. hACE2-  
426 A549 cells used in Fig. 2A (Daniloski et al., 2021) and hAce2-HEK293T (Miorin et al., 2020) were  
427 previously described. Vero TMPRSS2 (BPS Bioscience, 78081) cells were maintained in DMEM  
428 (Corning) supplemented with 10% FBS (Peak Serum), non-essential amino acids, sodium  
429 pyruvate (Corning), Penicillin/Streptomycin (Corning), and puromycin (3 µg/mL) (InvivoGen).  
430 IFNAR KO A549 cells were generated by CRISPR-Cas9 ribonucleoprotein (RNP) complex (IDT)  
431 transfection using the Nucleofector system (Lonza Bioscience). Specifically, a predesigned Alt-R  
432 CRISPR-Cas9 gRNA targeting exon 1 (design ID: Hs.Cas9.IFNAR1.1.AK), the ATTO 550 Alt-R  
433 CRISPR-Cas9 tracrRNA, and the Alt-R S.p. HiFi Cas9 Nuclease were used to form CRISPR-  
434 RNPs *in vitro*. Wild type and IFNAR KO A549 cells were then transduced with an Ace2 expression  
435 vector simultaneously using a pTRIP-SFFV-Blast-2A-myc-hACE2 construct, a kind gift from Nir  
436 Hacohen and Matteo Gentili (Massachusetts General Hospital and the Broad Institute),  
437 sequenced, and then functionally validated (Suppl. Fig. 3). All cell lines used in this study were  
438 regularly screened for mycoplasma contamination using the Universal Mycoplasma Detection Kit  
439 (ATCC, 30-1012K).

440

### 441 Viruses

442 SARS-CoV-2 isolate USA-WA1/2020 (BEI Resources NR-52281) stocks were grown in  
443 Vero E6 cells as previously described (Miorin et al., 2020). hCoV-19/Japan/TY7-503/2021 (P.1)  
444 was obtained from BEI Resources (NR-54982). hCoV-19/USA/MD-HP01542/2021 JHU (B.1.351)  
445 was a kind gift from Dr. Andy Pekosz. The SARS-CoV-2 Delta variant (B.1.617.2 PV29995) was

446 obtained from Dr. Viviana Simon (Mount Sinai Pathogen Surveillance Program). B.1.351,  
447 B.1.617.2, and P.1 viral stocks were grown on Vero TMPRSS2 cells. All viruses were validated  
448 by genome sequencing. NG-SARS-CoV-2, a stable monomeric NeonGreen-labeled SARS-CoV-  
449 2 virus (icSARS-CoV-2-mNG), was a kind gift from Pei-Yong Shi (University of Texas Medical  
450 Branch) (Xie et al., 2020). Virus was reconstituted from lyophilized sample and then titered using  
451 Vero cells as described (Huang et al., 2020; Xie et al., 2020). All experiments performed with a  
452 SARS-CoV-2 isolate were performed in accordance with biosafety protocols developed by  
453 ISMMS, the Ragon Institute of MGH, MIT and Harvard, or the National Emerging Infectious  
454 Diseases Laboratories of Boston University.

455

#### 456 ***In vitro* antiviral growth assay**

457 Vero E6, Ace2-A549, or Ace2-HEK293T cells were seeded in 96-well plates in DMEM  
458 (10% FBS) and incubated for 24 h at 37°C and 5% CO<sub>2</sub>. Four hours before infection the medium  
459 was replaced with 100 µl of DMEM (2% FBS) containing the compound of interest (NTZ, TIZ, or  
460 remdesivir) at concentrations 50% greater than those indicated, including a DMSO control. Plates  
461 were then transferred into the BSL-3 facility and infected at the desired MOI in 50 µl of DMEM  
462 (2% FBS), bringing the final compound concentration to those indicated. Plates were then  
463 incubated for 48 h at 37°C. After infection, supernatants were removed, and cells were fixed with  
464 4% paraformaldehyde for 24 hours prior to being removed from the BSL-3 facility. The cells were  
465 then immunostained for the viral NP protein (an in-house mAb 1C7 provided by Dr. Thomas  
466 Moran, Mount Sinai School of Medicine) with a DAPI counterstain. Infected cells (488 nm) and  
467 total cells (DAPI) were quantified using a Celigo (Nexcelcom) imaging cytometer. Percent  
468 infection was quantified as ([infected cells/total cells]-background) multiplied by 100 and the  
469 DMSO control was set to 100% infection for analysis. The IC<sub>50</sub> was determined using GraphPad  
470 Prism software. Cytotoxicity was performed using the MTT assay (Roche) in uninfected cells with  
471 the same compound dilutions and concurrent with the viral replication assay. All assays were



472 performed in biologically independent triplicates. Remdesivir was purchased from Medkoo  
473 Biosciences, Inc.

474

#### 475 ***In vitro* viral growth and infection analysis by FACS and Imaging Flow Cytometry**

476 For standard flow-cytometric analyses, cells treated with NTZ or mock treated and infected  
477 with NG-SARS-CoV2 and were terminated at the indicated time points. Cells were washed with  
478 PBS, fixed with 4% paraformaldehyde for 24 hrs and acquired on a BD FACSCanto. NeonGreen  
479 fluorescent infected cells were evaluated using Flow-Jo software after gating on live cell  
480 populations. For ImageStream analysis, cells treated with NTZ or mock treated and infected with  
481 NG-SARS-CoV2 were terminated at the indicated time points. Cells were washed with PBS and  
482 fixed with 4% paraformaldehyde for 24 hrs. Next, 3000 gated cells were acquired on an Amnis  
483 ImageStream<sup>x</sup> Mark II imaging flow cytometer (EMD Millipore). Live focused single cells were  
484 gated and NeonGreen fluorescent positive cells were evaluated using Ideas software and pixels  
485 were exported for further analysis on Prism to graph the dot plots and compare NTZ-treated to  
486 mock by the Mann-Whitney two-tailed test. To compare the numbers of NTZ-treated infected cells  
487 to mock-treated cells we used the Fisher exact test using Stata 12 software.

488

#### 489 **H9 stem cell-derived pneumocyte-like cell differentiation and SARS-CoV-2 infection**

490 Human embryonic stem cells (H9, WiCell, WA09) were cultured with mTeSR (STEMCELL  
491 Technologies, 85850) on Vitronectin XF (STEMCELL Technologies, 07180)-coated tissue culture  
492 plates and split in a ratio of 1:6 to 1:12 every four to six days with Gentle Cell Dissociation Reagent  
493 (STEMCELL Technologies, 07174). Alveolar differentiation was induced as previously described  
494 (Riva et al., 2020; White et al., 2021). Viral infections were performed in the BSL-3 facility on day  
495 nine after induction of differentiation, in accordance with biosafety protocols developed by ISMMS.  
496 Cells were fixed and analyzed two days post-infection. For assessment of infection rates, H9 cells  
497 were washed once with PBS, detached with 5 mM EDTA for 5 min at 37°C, and then fixed with

498 4% paraformaldehyde. Cells were washed in PBS supplemented with 2 mM EDTA, permeabilized  
499 using Perm/Wash buffer (BD Biosciences), and subsequently stained for 1 h at room temperature  
500 with anti-NP mAb 1C7 antibody labeled with an Alexa488-fluorescent marker using the Alexa  
501 Fluor™ 488 Antibody Labeling Kit (Invitrogen). Immunofluorescence-labelled cells were washed  
502 twice in PBS-EDTA after incubation with the antibody and then subjected to flow-cytometry  
503 analysis using a Gallios flow cytometer (Beckman Coulter). Cytotoxicity of the compounds was  
504 assessed using the MTT assay (Roche) in uninfected cells treated with the same compound  
505 dilution and concurrent with the viral replication assay.

506

#### 507 **iPSC differentiation into alveolar epithelial type 2 cells (iAT2s) for air-liquid interface** 508 **culture and SARS-CoV-2 infection**

509 Previously published human iPSCs (Huang et al., 2020) carrying an SPC2-SFTPC<sup>tdTomato</sup>  
510 reporter (iPSC clone SPC2-ST-B2, Boston University (Hurley et al., 2020)) were differentiated  
511 into alveolar epithelial type 2 cells (iAT2s) and maintained as alveolospheres embedded in three-  
512 dimensional (3D) Matrigel in “CK+DCI” media, as previously described (Jacob et al., 2019). iAT2s  
513 were serially passaged approximately every 2 weeks by dissociation into single cells via the  
514 sequential application of dispase (2 mg/mL; Thermo Fisher Scientific; 17105-04) and 0.05%  
515 trypsin (Invitrogen; 25300054) and replated at a density of 400 cells/ $\mu$ L of Matrigel (Corning;  
516 356231), as previously described (Jacob et al., 2019). To generate air-liquid interface (ALI)  
517 cultures, iAT2s were seeded at 520,000 live cells/cm<sup>2</sup> on Transwell inserts (Corning Cat#3470),  
518 and apical media was removed 2 days post-seeding. After 7 days post-seeding, iAT2 ALI cultures  
519 were ready to be infected with SARS-CoV-2 USA\_WA1/2020 or SARS-CoV-2-mNG at an MOI of  
520 0.04, along with mock controls. Prior to infection, RDV (Selleck Chem Cat#S8932) or NTZ was  
521 added to the apical and basolateral sides of the Transwell inserts for 30 minutes as indicated.  
522 The apical side was subsequently aspirated and replaced by SARS-CoV-2 diluted in CK+DCI  
523 media for one hour. At 2 days post-infection, samples were collected for downstream processing.

524 For flow cytometry and trypan blue staining, 200  $\mu$ L of Accutase (Sigma Cat# A6964) was added  
525 apically and incubated for 20 minutes at room temperature. The cells were collected and used  
526 directly for trypan blue staining or fixed with 10% formalin for at least 6 hours at 4°C and  
527 subsequently removed from BSL-4 prior to FACS analysis. After single cell suspension, analysis  
528 was performed by immunostaining for the viral NP protein as described for the H9-pneumocytes  
529 or by imaging flow cytometry using the ImageStream platform. For fluorescence microscopy, iAT2  
530 ALI cultures were fixed with 10% formalin for at least 6 hours at 4°C at the indicated times post-  
531 infection. Samples were then removed from BSL-4 and washed with PBS three times for 5  
532 minutes at room temperature. Cell nuclei on the transwell inserts were stained with DAPI dye  
533 (1:500, Life Technologies). The Transwell insert membranes were then cut out and mounted on  
534 slides using ProLong Diamond Antifade Mountant (Invitrogen Cat#P36965). Slides were imaged  
535 on a confocal microscope (Leica SP5).

536

### 537 **Antiviral combination assay**

538 2,000 Vero E6 cells per well were seeded into 96-well plates in DMEM (10% FBS) and  
539 incubated for 24 h at 37°C and 5% CO<sub>2</sub>. Two hours before infection, the medium was replaced  
540 with 100  $\mu$ l of DMEM (2% FBS) containing the combination of NTZ and RDV following a dilution  
541 combination matrix. A 6 by 6 matrix of drug combinations was prepared in triplicate by making  
542 serial two-fold dilutions of the drugs on each axis, including a DMSO control column and row. The  
543 resulting matrix had no drug in the right upper well, a single drug in rising 2-fold concentrations in  
544 the vertical and horizontal axes starting from that well, and the remaining wells with rising  
545 concentrations of drug mixtures reaching maximum concentrations of the drugs at the lower left  
546 well. Plates were then transferred into the BSL-3 facility and SARS-CoV-2 (MOI 0.025) was added  
547 in 50  $\mu$ l of DMEM (2% FBS), bringing the final compound concentration to those indicated in the  
548 figures. Plates were then incubated for 48 h at 37°C. After infection, cells were fixed with  
549 formaldehyde for 24 hours prior to being removed from the BSL-3 facility. The cells were then

550 immunostained for the viral NP protein as described above. This combination data was analyzed  
551 using SynergyFinder (Ianevski et al., 2020) by the Loewe method (Loewe, 1953).

552

### 553 **Spike-induced syncytia assay**

554 30,000 Vero-TMPRSS2 cells were reverse transfected with 100 ng of pCAGGS-S  
555 plasmids in a black 96-wellplate using TransIT-LT1 Transfection reagent (Mirus) in complete  
556 growth medium (containing 10% FBS). 4 hrs after transfection, medium containing transfection  
557 complexes was removed and replaced by medium containing 2% FBS and either DMSO or 15  
558  $\mu$ M NTZ. Cells were incubated for 24 hrs at 37°C to allow syncytium formation. After 24 h, cells  
559 were fixed with 4% paraformaldehyde in PBS (15 min), permeabilized with 0.1% Triton X-100  
560 (15 min) and stained for 30 min with 2  $\mu$ g/ml HCS Cell Mask stain (Life Technologies). Syncytia  
561 were counted microscopically in triplicate wells. The pCAGGS-S plasmids used in this assay have  
562 been previously described (Escalera et al., 2021).

563

### 564 ***In vivo* Syrian hamster infection with SARS-CoV-2**

565 Syrian Golden hamsters 10-12 weeks old (Envigo RMS, LLC), n = 42, were divided into 3  
566 groups of 14: naïve (n = 14), SARS-CoV-2-infected mock (PBS) treatment cohort (n = 14), and  
567 SARS-CoV-2-infected NTZ (NT-300, a gift from Romark, Inc)-treated at 300 mg/kg/per day bi-  
568 daily cohort (n = 14). Hamsters in the infected cohorts were infected intranasally with SARS-CoV-  
569 2 (isolate USA-WA1/2020) in a 50  $\mu$ l suspension containing a targeted dose of 100 PFU (actual  
570 dose was 300 PFU). On the day of SARS-CoV-2 challenge the mock cohort was treated with  
571 sterile PBS and the NTZ-treated cohort was treated with 150 mg/kg of NTZ at 6 hours before  
572 challenge and then 6 hours after challenge with subsequent treatments for these 2 cohorts every  
573 12 hours (bi-daily) for the remaining 4 days of treatment. Cohorts were treated via oral gavage  
574 using an 18 gauge x 2 inch curved animal feeding needle to deliver 1 ml of volume per treatment.  
575 Lungs and sera were harvested for virus load analysis from 4 hamsters per group on day 2, 5,

576 and 14 post SARS-CoV-2 challenge. Weight loss was monitored from the first treatment time  
577 point through end of the study on day 14 post SARS-CoV-2 challenge. Weight loss was monitored  
578 for all hamsters throughout the study for humane endpoint criteria. Percent weight loss data (Fig.  
579 4A) were derived from 6 hamsters that went to study endpoint at day 14 post-SARS-CoV-2  
580 challenge.

581

## 582 **Plaque assay**

583 Plaque assays were performed using Vero E6 cells as previously described (Amanat et  
584 al., 2020). Briefly, Vero E6 cells seeded in 12-well plate format were infected with serial ten-fold  
585 dilutions of supernatants from homogenized lung tissues. Virus absorption was carried out for 1  
586 hour using an inoculum of 200  $\mu$ l and rocking the plates every 10-15 min. After 1 hour, the  
587 inoculum was removed, and the cells were incubated with an overlay composed of MEM with 2%  
588 FBS and 0.7% Oxoid agar for 72 hours at 37°C with 5% CO<sub>2</sub>. The plates were subsequently fixed  
589 using 5% formaldehyde and immuno-stained using a monoclonal anti-SARS-CoV-NP antibody  
590 (Creative-Biolabs; NP1C7C7). In brief, plates were blocked (3% skim-milk TBS with 0.1%  
591 Tween20 for 1 h), stained for 90 min with anti-NP antibody (mAb 1C7, diluted 1:1000 in 1% skim-  
592 milk TBS with 0.1% Tween20), and finally secondary-stained with anti-mouse-HRP (antibody  
593 diluted 1:5000 in 1% skim-milk TBS with 0.1% Tween20 for 45 mins). Plates were incubated for  
594 10 min with KPL TrueBlue peroxidase substrate (Seracare) to reveal staining.

595

## 596 **Pathology analysis: histologic processing and semi-quantitative analysis**

597 Tissue samples were fixed for a minimum of 7 days in 10% neutralized buffered formalin  
598 before being removed from BSL-4 and subsequently processed in a Tissue-Tek VIP-6 automated  
599 vacuum infiltration processor (Sakura Finetek) and embedded in paraffin using a HistoCore  
600 Arcadia paraffin embedding machine (Leica). 5  $\mu$ m tissue sections were generated using an  
601 RM2255 rotary microtome (Leica) and transferred to positively charged slides, deparaffinized in

602 xylene, and dehydrated in graded ethanol. Tissue sections were stained with hematoxylin and  
603 eosin for histologic examination, with additional serial sections utilized for immunohistochemistry  
604 (IHC). A Ventana Discovery Ultra (Roche) tissue autostainer was used for IHC. Specific protocol  
605 details are outlined in Suppl. Table 1. In brief, SARS-CoV-2 spike protein monoplex IHC was  
606 conducted using a Chromomab DAB IHC kit (Roche, Basel, Switzerland) with CC1 antigen  
607 retrieval at 95°C for 64 minutes, primary incubation at 1:900 for 40 min at room temperature,  
608 rabbit anti-IgG1+IgG2a+IgG3 antibody (ab133469) at 37°C for 20 minutes (1:1,000), and  
609 ImmPRESS HRP Goat Anti-Rabbit IgG polymer pre-dilute detection (Vector Laboratories) at 37°C  
610 for 20 minutes. Uninfected animals served as negative controls, while SARS-CoV-2 animals  
611 receiving PBS and no therapeutic served as positive controls confirming the specificity of the  
612 assay. Histomorphological analysis was performed by a single board-certified veterinary  
613 pathologist (N.A.C.), who developed an ordinal grading score encompassing the diversity and  
614 severity of histologic findings outlined in Table 2. Histologic criteria were broken down into three  
615 compartments: airways, blood vessels, and interstitium, with results utilized to generate a  
616 cumulative lung injury score. This score also incorporated the overall degree of immunoreactivity  
617 to the SARS-CoV-2 Spike antigen. A summary of individual animal scores and specific criteria  
618 utilized to score lungs is included in Suppl. Tables 1 and 2.

619

## 620 **Quantitative Image Analysis**

621 Digitized whole slide scans were analyzed using the image analysis software HALO  
622 (Indica Labs, Inc., Corrales, NM). Slides were manually annotated to select pulmonary  
623 parenchyma, excluding non-pulmonary tissues (i.e., tracheobronchial lymph nodes, adipose  
624 tissue, etc.). Quantitative outputs were obtained using the Area Quantification (AQ) module, which  
625 reports total area of immunoreactivity of a specified parameter within a region of interest. Values  
626 are given as a percentage of total tissue area analyzed. Minimum dye intensity thresholds were

627 established using the real-time tuning field of view module to accurately detect positive

628 immunoreactivity for SARS-CoV-2 Spike antigen.

629

630 **ACKNOWLEDGEMENTS**

631

632 This work was funded by grants from the Annenberg Foundation, Fast Grants, and the  
633 NIH (R21AI151732), and a laboratory gift from Jeanne Sullivan to AEG. This research was also  
634 partly funded by grants from CRIPT (Center for Research on Influenza Pathogenesis and  
635 Transmission), an NIAID-funded Center of Excellence for Influenza Research and Response  
636 (CEIRR, contract 75N93021C00014), NCI SeroNet grant U54CA260560; NIAID grants  
637 U19AI135972 and U19AI142733, DARPA grant HR0011-19-2-0020; a supplement to DoD grant  
638 W81XWH-20-1-0270, JPB Foundation, Open Philanthropy Project (research grant 2020-215611  
639 (5384)), and by anonymous donors to AG-S; and by PRIME (Program for Research on Immune  
640 Modeling and Experimentation), an NIAID-funded Modeling Immunity for Biodefense Center  
641 (grant U19 AI117873), and CRIP (Center for Research on Influenza Pathogenesis), and an NIAID-  
642 funded Center of Excellence for Influenza Research and Surveillance (CEIRS, contract  
643 HHSN272201400008C) to AF-S and AG-S. The work was also supported by grants from the NIH  
644 (R01HL095993, U01TR001810, N01 75N92020C00005) and Evergrande COVID-19 Response  
645 Fund Awards from the Massachusetts Consortium on Pathogen Readiness (MassCPR) to DNK;  
646 Fast Grants, NIH (NCATS, UL1TR001430), and MassCPR to EM; MassCPR to RC; SIG grants  
647 S10-OD026983 and S10-OD030269 to NAC; NIH (F30HL147426) to KMA; CJ Martin Early  
648 Career Fellowship from the Australian National Health and Medical Research Council to RBW;  
649 and NIH (U01TR001810, UL1TR001430, R01DK101501, and R01DK117940) to AAW.

650 We thank Romark Inc. for the gift of NTZ-300, S-Y Pei and UTMB for the gift of NG-SARS-  
651 CoV-2, Nir Hacohen and Matteo Gentili for the gift of pTRIP-SFFV-Blast-2A-myc-hACE2, and  
652 Michael Farzan and Huihui Mu for the gift of pQCXIP-myc-hACE2-c9. We also thank Randy  
653 Albrecht for support with the BSL-3 facility and procedures at the ISMMS, Julie Boucou and Xie  
654 Yong for support and advice at the BSL-3 facility at the Ragon Institute of MGH, MIT and Harvard,  
655 Richard Cadagan, Hans P. Gertje, and Paige Montanaro for technical assistance, and the



656 Microscopy Shared Resource Facility at the Icahn School of Medicine at Mount Sinai. We are  
657 grateful to Gail Cassell for helpful discussions through the years.

658 Finally, we are indebted to Wallis Annenberg, Jeanne Sullivan, and the founders of Fast  
659 Grants for their critical and early support.

660

#### 661 **Conflict of interest**

662 The AG-S laboratory has received research support from Pfizer, Senhwa Biosciences,  
663 Kenall Manufacturing, Avimex, Johnson & Johnson, Dynavax, 7Hills Pharma, Pharmamar,  
664 ImmunityBio, Accurius, Nanocomposix, Hexamer, N-fold LLC, Model Medicines, Atea Pharma,  
665 and Merck outside of the reported work. AG-S has consulting agreements for the following  
666 companies involving cash and/or stock outside of the reported work: Vivaldi Biosciences,  
667 Contrafect, 7Hills Pharma, Avimex, Vaxalto, Pagoda, Accurius, Esperovax, Farmak, Applied  
668 Biological Laboratories, Pharmamar, Paratus, CureLab Oncology, CureLab Veterinary, and  
669 Pfizer. AG-S is inventor on patents and patent applications on the use of antivirals and vaccines  
670 for the treatment and prevention of virus infections and cancer, owned by the Icahn School of  
671 Medicine at Mount Sinai, New York, outside of the reported work. J-FR is an employee of, and  
672 owns an equity interest in, Romark, L.C. The authors claim no other competing interests.

673 **FIGURE LEGENDS**

674

675 **Fig. 1 SARS-CoV-2 replication is inhibited by NTZ or TIZ in Vero E6 cells.**

676 **A.** Schema of the antiviral assay. **B.** Percent inhibition of SARS-CoV-2 replication and cytotoxicity  
677 assay in Vero E6 cells in the presence of the indicated drugs: NTZ (nitazoxanide), TIZ  
678 (tizoxanide), Remdesivir (RDV). Vero E6 cells were infected with 100 PFU (MOI 0.025) of SARS-  
679 CoV-2 (isolate USA-WA1/2020) in the presence of increasing concentrations of drug for 48 hrs,  
680 after which viral replication was measured by NP immunostaining as described in Materials and  
681 Methods. In all panels, viral infectivity is shown as a solid black line and cell toxicity as a dashed  
682 red line. Calculated  $IC_{50}$  is indicated in the bottom-left corner of each plot. RDV is included as a  
683 standard of care control. **C.** Quantitative inhibition of NeonGreen SARS-CoV-2 in Vero E6 cells  
684 measured by flow cytometry and quantitative imaging flow cytometry using the ImageStream  
685 platform. Vero E6 cells were pretreated with 5 or 10  $\mu$ M NTZ or carrier (DMSO) for 4 hrs and then  
686 infected with NeonGreen (NG)-SARS-CoV2 at an MOI of 0.025 or 0.25. At 48 hrs post-infection  
687 cultures were fixed for 24 hrs before FACS and ImageStream analysis. (i) The percentage of  
688 infection as measured by FACS. Experiments were performed at least three independent times.  
689 (ii) Dot plot displaying the quantification of NG pixels as a representation of NG-SARS-CoV-2  
690 fluorescence in infected cells (among the 3000 cells acquired). Asterisks indicate significant  
691 differences in NTZ-treated samples as compared to DMSO control by two-tailed Mann-Whitney  
692 test.  $**P < 0.001$  for each comparison. The number of infected cells in each experimental condition  
693 is shown at the bottom of the panel. We found significant reduction of infected cells in NTZ-treated  
694 cultures at both MOIs and both concentrations of NTZ ( $***P < 0.0001$  for each comparison) by  
695 Fisher exact test using Stata 12 software. Experiments were performed at least three independent  
696 times. (iii) Images of representative NeonGreen-SARS-CoV-2 infected cells were selected from  
697 the median levels of pixels shown in the analysis in panel (ii). **D.** Antiviral activity curves by RDV

698 in the presence of increasing concentrations of NTZ. **E.** Synergy landscapes and combination  
699 scores generated by the Loewe method using SynergyFinder software.

700

701 **Fig. 2 Antiviral activity of NTZ and TIZ in Ace2-A549 cells.**

702 **A.** Percent inhibition of SARS-CoV-2 replication and cytotoxicity assay in Ace2-A549 cells in the  
703 presence of NTZ, TIZ, or RDV. Cells were treated with the indicated drug for 4 hrs prior to infection  
704 with SARS-CoV-2 (isolate USA-WA1/2020) at MOI 0.1 for 48 hrs. Viral replication was measured  
705 by NP immunostaining as described in Materials and Methods. In all panels, viral infectivity is  
706 shown as a solid black line and cell toxicity as a dashed red line. Calculated IC<sub>50</sub> is indicated at  
707 the bottom of each plot. RDV is included as a standard of care control. **B.** Quantitative inhibition  
708 of NG-SARS-CoV-2 in Ace2-A549 cells measured by flow cytometry and quantitative imaging  
709 flow cytometry using the ImageStream platform. Ace2-A549 cells were pretreated with 5 or 10 μM  
710 NTZ or carrier (DMSO) for 4 hrs before infection at an MOI of 0.05 or 0.01. At 48 hrs post-infection  
711 cells were fixed and evaluated by FACS and by quantitative imaging flow cytometry as described  
712 in the legend to Fig. 1. (i) The percentage of infection as measured by FACS. Experiments were  
713 performed at least three independent times. (ii) Dot plot displaying the quantification of NG pixels  
714 as a representation of NG-SARS-CoV-2 fluorescence in infected cells (among the 3000 cells  
715 acquired). Asterisks indicate significant differences as compared to DMSO control by two-tailed  
716 Mann-Whitney test: \*\* $P < 0.005$  and \* $P < 0.05$ . The number of infected cells in each experimental  
717 condition is shown at the bottom of the panel. We found significant reduction of infected cells in  
718 NTZ-treated cultures at both MOIs and both concentrations of NTZ (\*\* $P < 0.0001$  for each  
719 comparison). Experiments were performed at least three independent times. (iii) Images of  
720 representative NeonGreen-SARS-CoV-2 infected cells were selected from the median levels of  
721 pixels shown in the analysis in panel (ii). **C.** NTZ's inhibitory effect on NG-SARS-CoV-2 growth in  
722 wild-type (WT) and IFNAR-KO Ace2-A549 cells. (i) Plots displaying the quantification of NG pixels  
723 as in (B). The number of infected cells in each experimental condition is shown at the bottom of

724 the panel. We found significant reduction of infected cells in NTZ treated cultures at both MOIs  
725 and both concentrations of NTZ ( $***P<0.0001$  for each comparison) by Fisher exact test using  
726 Stata 12 software. Experiments were performed at least three independent times. (ii) Images of  
727 representative NeonGreen-SARS-CoV-2 infected cells were selected from the median levels of  
728 pixels shown in the analysis in panel. In all panels, asterisks indicate significant differences as  
729 compared to DMSO control by two-tailed Mann-Whitney test:  $*P<0.05$ ,  $**P<0.005$ ,  $***P<0.0001$ .

730

731 **Fig 3. NTZ is highly active against SARS-CoV-2 infection in stem cell-derived human lung**

732 **alveolar epithelial cultures. A.** H9-derived pneumocyte-like cells were infected with SARS-CoV-

733 2 (isolate USA-WA1/2020) at an MOI of 0.1 in the presence of the indicated concentrations of

734 NTZ or vehicle (DMSO). All cells were pretreated for 4 hrs and NTZ or DMSO were maintained in

735 the media throughout the experiment. SARS-CoV-2 infection (NP immunostaining) and cell

736 viability (MTT assay) were measured at 48 hrs. Asterisks indicate statistically significant

737 differences as shown on the graph. **B.** iPSC-derived alveolar epithelial type 2 cells (iAT2s) were

738 infected with SARS-CoV-2 (isolate USA-WA1/2020) at an MOI of 0.5 in the presence of the

739 indicated concentrations of NTZ or vehicle (DMSO) as described in Materials and Methods.

740 Percent infection was measured by NP immunostaining and cell viability by trypan blue exclusion

741 performed on infected and treated cells. Asterisks indicate statistically significant differences as

742 shown on the graph. Experiments were performed at least three independent times. **C.**

743 Quantitative imaging flow cytometry IDEAS analysis of NG-SARS-CoV-2-infected iAT2 in the

744 presence of vehicle (DMSO) or NTZ (15  $\mu$ M). 3000 cells were acquired on an ImageStream<sup>X</sup> Mark

745 II instrument and evaluated for pixel intensity of NeonGreen (left). The median cellular

746 fluorescence of the NG-SARS-CoV-2-infected iAT2 cells was significantly reduced in the NTZ-

747 treated vs. mock-treated cultures ( $p=0.026$ ). The reduction of the number of infected cells in NTZ-

748 treated cultures was significant ( $***P<0.0001$ ) by Fisher exact test using Stata 12 software.

749 Representative images of intracellular NG levels at the median range marked by the red line in  
750 the dot plot (right).

751

752 **Fig 4. NTZ inhibits replication of different SARS-CoV-2 VOCs and strongly reduces spike-**  
753 **mediated syncytia formation.**

754 **A.** Vero E6 cells were treated with DMSO or 15  $\mu$ M NTZ four hrs before infection with the indicated  
755 SARS-CoV-2 isolates at an MOI of 0.025 for 48 hrs. Viral replication was measured by NP  
756 immunostaining and quantified using a Celigo imaging cytometer as described in Materials and  
757 Methods. **B.** Vero TMPRSS2 cells were reverse transfected with 100 ng of pCAGGS plasmids  
758 expressing the spike protein from the SARS-CoV-2 variants of concern indicated in the figure.  
759 Four hours after transfection, medium containing transfection complexes was removed and  
760 replaced by medium containing 2% FBS and either DMSO or 15  $\mu$ M NTZ. After 24 hrs, cells were  
761 fixed and stained with HCS Cell Mask stain (Life Technologies). **C.** Quantification of spike-induced  
762 syncytia formation from (B). Syncytia were counted microscopically in triplicate wells. In all panels,  
763 asterisks indicate statistically significant differences (\*\* $P$ <0.001).

764

765 **Fig 5. Oral delivery of NTZ significantly reduces weight loss and decreases lung viral load**  
766 **in the Syrian hamster model.**

767 **A.** Percent of starting body weight from the day of challenge (day 0) to 14 days post-infection in  
768 naïve and SARS-CoV-2 (isolate USA-WA1/2020)-infected Syrian hamsters treated with NTZ 300  
769 mg/kg bi-daily or treated with vehicle by oral gavage. Four animals were euthanized on days 2,  
770 5, and 14 for lung removal and serum collection. Day 14 was the study endpoint. Asterisk indicates  
771 statistically significant differences by one-tailed unpaired Student's t-test. **B.** SARS-CoV-2 titer in  
772 lungs from vehicle- and NTZ-treated animals. The  $P$  value indicated shows the differences at day  
773 2 by one-tailed unpaired Mann-Whitney test. Lungs from 4 animals were included in the IHC  
774 analysis for each timepoint except for the 2 dpi timepoint, where there were 3 SARS-CoV-2

775 PBS/vehicle-treated animals. **C.** Representative images of lung tissue collected at 2 dpi and  
776 subjected to immunohistochemistry with SARS-CoV-2 Spike-specific antibody. Insets show  
777 higher magnification of the lung interstitium, where viral antigen was only observed in the SARS-  
778 CoV-2 vehicle-treated animals. Scale bars, 100  $\mu$ m. Graph shows quantification of pixels of  
779 SARS-CoV-2 Spike protein/micron of Syrian hamster lung tissue. Asterisk indicates statistically  
780 significant differences by one-tailed unpaired Student's t-test at day 2.

781

782 **Fig 6. NTZ significantly prevents lung pathology SARS-CoV-2 infected Syrian hamsters.**

783 **A.** Comparison of normal lung (naïve) to pathologic changes induced by SARS-CoV-2 in vehicle-  
784 vs. NTZ-treated animals at day 2, 5, and 14 post-infection. Lung pathology at 5 dpi was severe  
785 irrespective of treatment group. **B.** NTZ significantly reduced interstitial inflammatory and  
786 perivascular scores at 2 and 14 days post-infection. Qualitatively there was decreased bronchiole  
787 epithelial injury and associated luminal inflammatory exudate. Lung pathology at 5 dpi was severe  
788 irrespective of treatment group. Asterisk indicates statistically significant differences by one-tailed  
789 unpaired Student's t-test at day 2 for interstitium and on day 14 for blood vessels. Lungs from 4  
790 animals were included in the scoring analysis for each timepoint except for 2 dpi, where there  
791 were 3 SARS-CoV-2 PBS/vehicle-treated animals. **C.** Bronchiole syncytial cells were observed  
792 exclusively at 5 dpi in SARS-CoV-2-inoculated animals and were more frequently observed in the  
793 vehicle treated group. Scale bars: A, 100  $\mu$ m; C, 50  $\mu$ m.

794 **REFERENCES**

- 795
- 796 Alwan, W.H., Dieppe, P.A., Elson, C.J., and Bradfield, J.W. (1988). Bone resorbing activity in  
797 synovial fluids in destructive osteoarthritis and rheumatoid arthritis. *Ann Rheum Dis* 47, 198-  
798 205.
- 799
- 800 Amanat, F., White, K.M., Miorin, L., Strohmeier, S., McMahon, M., Meade, P., Liu, W.C.,  
801 Albrecht, R.A., Simon, V., Martinez-Sobrido, L., *et al.* (2020). An in vitro microneutralization  
802 assay for SARS-CoV-2 serology and drug screening. *Curr Protoc Microbiol* 58, e108.
- 803
- 804 Beigel, J.H., Tomashek, K.M., Dodd, L.E., Mehta, A.K., Zingman, B.S., Kalil, A.C., Hohmann,  
805 E., Chu, H.Y., Luetkemeyer, A., Kline, S., *et al.* (2020). Remdesivir for the treatment of Covid-  
806 19 - final report. *N Engl J Med* 383, 1813-1826.
- 807
- 808 Blum, V.F., Cimerman, S., Hunter, J.R., Tierno, P., Lacerda, A., Soeiro, A., Cardoso, F., Bellei,  
809 N.C., Maricato, J., Mantovani, N., *et al.* (2021). Nitazoxanide superiority to placebo to treat  
810 moderate COVID-19 - A Pilot prove of concept randomized double-blind clinical trial.  
811 *eClinicalMedicine* 37, 100981.
- 812
- 813 Bobrowski, T., Chen, L., Eastman, R.T., Itkin, Z., Shinn, P., Chen, C.Z., Guo, H., Zheng, W.,  
814 Michael, S., Simeonov, A., *et al.* (2021). Synergistic and antagonistic drug combinations against  
815 SARS-CoV-2. *Mol Ther* 29, 873-885.
- 816
- 817 Braga, L., Ali, H., Secco, I., Chiavacci, E., Neves, G., Goldhill, D., Penn, R., Jimenez-Guardeno,  
818 J.M., Ortega-Prieto, A.M., Bussani, R., *et al.* (2021). Drugs that inhibit TMEM16 proteins block  
819 SARS-CoV-2 spike-induced syncytia. *Nature* 594, 88-93.
- 820
- 821 Caputo, A., Caci, E., Ferrera, L., Pedemonte, N., Barsanti, C., Sondo, E., Pfeffer, U., Ravazzolo,  
822 R., Zegarra-Moran, O., and Galletta, L.J. (2008). TMEM16A, a membrane protein associated  
823 with calcium-dependent chloride channel activity. *Science* 322, 590-594.
- 824
- 825 Cardenas, W.B., Loo, Y.M., Gale, M., Jr., Hartman, A.L., Kimberlin, C.R., Martinez-Sobrido,  
826 L., Saphire, E.O., and Basler, C.F. (2006). Ebola virus VP35 protein binds double-stranded RNA  
827 and inhibits alpha/beta interferon production induced by RIG-I signaling. *J Virol* 80, 5168-5178.
- 828
- 829 Chan, J.F., Zhang, A.J., Yuan, S., Poon, V.K., Chan, C.C., Lee, A.C., Chan, W.M., Fan, Z., Tsoi,  
830 H.W., Wen, L., *et al.* (2020). Simulation of the clinical and pathological manifestations of  
831 Coronavirus Disease 2019 (COVID-19) in golden Syrian hamster model: implications for  
832 disease pathogenesis and transmissibility. *Clin Infect Dis* 71, 2428-2446.
- 833
- 834 Daniloski, Z., Jordan, T.X., Wessels, H.H., Hoagland, D.A., Kasela, S., Legut, M., Maniatis, S.,  
835 Mimitou, E.P., Lu, L., Geller, E., *et al.* (2021). Identification of required host factors for SARS-  
836 CoV-2 infection in human cells. *Cell* 184, 92-105 e116.
- 837
- 838 Doan, M., Vorobjev, I., Rees, P., Filby, A., Wolkenhauer, O., Goldfeld, A.E., Lieberman, J.,  
839 Barteneva, N., Carpenter, A.E., and Hennig, H. (2018). Diagnostic potential of imaging flow  
840 cytometry. *Trends Biotechnol* 36, 649-652.



841  
842 Dong, E., Du, H., and Gardner, L. (2020). An interactive web-based dashboard to track COVID-  
843 19 in real time. *Lancet Infect Dis* 20, 533-534.  
844  
845 Doumbo, O., Rossignol, J.F., Pichard, E., Traore, H.A., Dembele, T.M., Diakite, M., Traore, F.,  
846 and Diallo, D.A. (1997). Nitazoxanide in the treatment of cryptosporidial diarrhea and other  
847 intestinal parasitic infections associated with acquired immunodeficiency syndrome in tropical  
848 Africa. *Am J Trop Med Hyg* 56, 637-639.  
849  
850 Emeny, J.M., and Morgan, M.J. (1979). Regulation of the interferon system: evidence that Vero  
851 cells have a genetic defect in interferon production. *J Gen Virol* 43, 247-252.  
852  
853 Escalera, A., Gonzalez-Reiche, A.S., Aslam, S., Mena, I., Pearl, R.L., Laporte, M., Fossati, A.,  
854 Rathnasinghe, R., Alshammery, H., van de Guchte, A., *et al.* (2021). SARS-CoV-2 variants of  
855 concern have acquired mutations associated with an increased spike cleavage. *bioRxiv*.  
856  
857 Feng, Z., Cerveny, M., Yan, Z., and He, B. (2007). The VP35 protein of Ebola virus inhibits the  
858 antiviral effect mediated by double-stranded RNA-dependent protein kinase PKR. *J Virol* 81,  
859 182-192.  
860  
861 Gottlieb, R.L., Vaca, C.E., Paredes, R., Mera, J., Webb, B.J., Perez, G., Oguchi, G., Ryan, P.,  
862 Nielsen, B.U., Brown, M., *et al.* (2021). Early remdesivir to prevent progression to severe Covid-  
863 19 in outpatients. *N Engl J Med* 386, 305-315.  
864  
865 Haffizulla, J., Hartman, A., Hoppers, M., Resnick, H., Samudrala, S., Ginocchio, C., Bardin, M.,  
866 Rossignol, J.F., and Group, U.S.N.I.C.S. (2014). Effect of nitazoxanide in adults and adolescents  
867 with acute uncomplicated influenza: a double-blind, randomised, placebo-controlled, phase 2b/3  
868 trial. *Lancet Infect Dis* 14, 609-618.  
869  
870 Haridas, V., Ranjbar, S., Vorobjev, I.A., Goldfeld, A.E., and Barteneva, N.S. (2017). Imaging  
871 flow cytometry analysis of intracellular pathogens. *Methods* 112, 91-104.  
872  
873 Harvey, W.T., Carabelli, A.M., Jackson, B., Gupta, R.K., Thomson, E.C., Harrison, E.M.,  
874 Ludden, C., Reeve, R., Rambaut, A., Consortium, C.-G.U., *et al.* (2021). SARS-CoV-2 variants,  
875 spike mutations and immune escape. *Nat Rev Microbiol* 19, 409-424.  
876  
877 Hou, Y.J., Okuda, K., Edwards, C.E., Martinez, D.R., Asakura, T., Dinnon, K.H., 3rd, Kato, T.,  
878 Lee, R.E., Yount, B.L., Mascenik, T.M., *et al.* (2020). SARS-CoV-2 reverse genetics reveals a  
879 variable infection gradient in the respiratory tract. *Cell* 182, 429-446 e414.  
880  
881 Huang, J., Hume, A.J., Abo, K.M., Werder, R.B., Villacorta-Martin, C., Alysandratos, K.D.,  
882 Beermann, M.L., Simone-Roach, C., Lindstrom-Vautrin, J., Olejnik, J., *et al.* (2020). SARS-  
883 CoV-2 infection of pluripotent stem cell-derived human lung Alveolar Type 2 cells elicits a rapid  
884 epithelial-intrinsic inflammatory response. *Cell Stem Cell* 27, 962-973 e967.  
885



886 Hurley, K., Ding, J., Villacorta-Martin, C., Herriges, M.J., Jacob, A., Vedaie, M., Alysandratos,  
887 K.D., Sun, Y.L., Lin, C., Werder, R.B., *et al.* (2020). Reconstructed single-cell fate trajectories  
888 define lineage plasticity windows during differentiation of human PSC-derived distal lung  
889 progenitors. *Cell Stem Cell* 26, 593-608 e598.  
890  
891 Hussar, D.A. (2004). New drugs of 2003. *J Am Pharm Assoc* (2003) 44, 168-206; quiz 207-110.  
892 Ianevski, A., Giri, A.K., and Aittokallio, T. (2020). SynergyFinder 2.0: visual analytics of multi-  
893 drug combination synergies. *Nucleic Acids Res* 48, W488-W493.  
894  
895 Imai, M., Iwatsuki-Horimoto, K., Hatta, M., Loeber, S., Halfmann, P.J., Nakajima, N.,  
896 Watanabe, T., Ujie, M., Takahashi, K., Ito, M., *et al.* (2020). Syrian hamsters as a small animal  
897 model for SARS-CoV-2 infection and countermeasure development. *Proc Natl Acad Sci USA*  
898 117, 16587-16595.  
899  
900 Jacob, A., Vedaie, M., Roberts, D.A., Thomas, D.C., Villacorta-Martin, C., Alysandratos, K.D.,  
901 Hawkins, F., and Kotton, D.N. (2019). Derivation of self-renewing lung alveolar epithelial type  
902 II cells from human pluripotent stem cells. *Nat Protoc* 14, 3303-3332.  
903  
904 Jasenosky, L.D., Cadena, C., Mire, C.E., Borisevich, V., Haridas, V., Ranjbar, S., Nambu, A.,  
905 Bavari, S., Soloveva, V., Sadukhan, S., *et al.* (2019). The FDA-Approved Oral Drug  
906 Nitazoxanide Amplifies Host Antiviral Responses and Inhibits Ebola Virus. *iScience* 19, 1279-  
907 1290.  
908  
909 Jayk Bernal, A., Gomes da Silva, M.M., Musungaie, D.B., Kovalchuk, E., Gonzalez, A., Delos  
910 Reyes, V., Martin-Quiros, A., Caraco, Y., Williams-Diaz, A., Brown, M.L., *et al.* (2021).  
911 Molnupiravir for Oral Treatment of Covid-19 in Nonhospitalized Patients. *N Engl J Med*.  
912 Ledford, H. (2021). COVID antiviral pills: what scientists still want to know. *Nature* 599, 358-  
913 359.  
914  
915 Leung, D.W., Ginder, N.D., Fulton, D.B., Nix, J., Basler, C.F., Honzatko, R.B., and  
916 Amarasinghe, G.K. (2009). Structure of the Ebola VP35 interferon inhibitory domain. *Proc Natl*  
917 *Acad Sci U S A* 106, 411-416.  
918  
919 Leung, D.W., Prins, K.C., Borek, D.M., Farahbakhsh, M., Tufariello, J.M., Ramanan, P., Nix,  
920 J.C., Helgeson, L.A., Otwinowski, Z., Honzatko, R.B., *et al.* (2010). Structural basis for dsRNA  
921 recognition and interferon antagonism by Ebola VP35. *Nat Struct Mol Biol* 17, 165-172.  
922  
923 Leventhal, S.S., Clancy, C., Erasmus, J., Feldmann, H., and Hawman, D.W. (2021). An  
924 Intramuscular DNA Vaccine for SARS-CoV-2 Decreases Viral Lung Load but Not Lung  
925 Pathology in Syrian Hamsters. *Microorganisms* 9, 1040.  
926  
927 Loewe, S. (1953). The problem of synergism and antagonism of combined drugs.  
928 *Arzneimittelforschung* 3, 285-290.  
929

- 930 Matsuyama, S., Nao, N., Shirato, K., Kawase, M., Saito, S., Takayama, I., Nagata, N., Sekizuka,  
931 T., Katoh, H., Kato, F., *et al.* (2020). Enhanced isolation of SARS-CoV-2 by TMPRSS2-  
932 expressing cells. *Proc Natl Acad Sci USA* *117*, 7001-7003.
- 933  
934 Miner, K., Labitzke, K., Liu, B., Wang, P., Henckels, K., Gaida, K., Elliott, R., Chen, J.J., Liu,  
935 L., Leith, A., *et al.* (2019). Drug repurposing: the anthelmintics niclosamide and nitazoxanide are  
936 potent TMEM16A antagonists that fully bronchodilate airways. *Front Pharmacol* *10*, 51.
- 937  
938 Miorin, L., Kehrer, T., Sanchez-Aparicio, M.T., Zhang, K., Cohen, P., Patel, R.S., Cupic, A.,  
939 Makio, T., Mei, M., Moreno, E., *et al.* (2020). SARS-CoV-2 Orf6 hijacks Nup98 to block STAT  
940 nuclear import and antagonize interferon signaling. *Proc Natl Acad Sci U S A* *117*, 28344-  
941 28354.
- 942  
943 Osada, N., Kohara, A., Yamaji, T., Hirayama, N., Kasai, F., Sekizuka, T., Kuroda, M., and  
944 Hanada, K. (2014). The genome landscape of the African green monkey kidney-derived vero cell  
945 line. *DNA Res* *21*, 673-683.
- 946  
947 Piacentini, S., La Frazia, S., Riccio, A., Pedersen, J.Z., Topai, A., Nicolotti, O., Rossignol, J.F.,  
948 and Santoro, M.G. (2018). Nitazoxanide inhibits paramyxovirus replication by targeting the  
949 Fusion protein folding: role of glycoprotein-specific thiol oxidoreductase ERp57. *Sci Rep* *8*,  
950 10425.
- 951  
952 Pruijssers, A.J., George, A.S., Schafer, A., Leist, S.R., Gralinski, L.E., Dinnon, K.H., 3rd, Yount,  
953 B.L., Agostini, M.L., Stevens, L.J., Chappell, J.D., *et al.* (2020). Remdesivir Inhibits SARS-  
954 CoV-2 in Human Lung Cells and Chimeric SARS-CoV Expressing the SARS-CoV-2 RNA  
955 Polymerase in Mice. *Cell Rep* *32*, 107940.
- 956  
957 Ranjbar, S., Haridas, V., Nambu, A., Jasenosky, L.D., Sadhukhan, S., Ebert, T.S., Hornung, V.,  
958 Cassell, G.H., Falvo, J.V., and Goldfeld, A.E. (2019). Cytoplasmic RNA Sensor Pathways and  
959 Nitazoxanide Broadly Inhibit Intracellular *Mycobacterium tuberculosis* Growth. *iScience* *22*,  
960 299-313.
- 961  
962 Reid, S.P., Leung, L.W., Hartman, A.L., Martinez, O., Shaw, M.L., Carbonnelle, C., Volchkov,  
963 V.E., Nichol, S.T., and Basler, C.F. (2006). Ebola virus VP24 binds karyopherin  $\alpha$ 1 and blocks  
964 STAT1 nuclear accumulation. *J Virol* *80*, 5156-5167.
- 965  
966 Reid, S.P., Valmas, C., Martinez, O., Sanchez, F.M., and Basler, C.F. (2007). Ebola virus VP24  
967 proteins inhibit the interaction of NPI-1 subfamily karyopherin  $\alpha$  proteins with activated STAT1.  
968 *J Virol* *81*, 13469-13477.
- 969  
970 Riva, L., Yuan, S., Yin, X., Martin-Sancho, L., Matsunaga, N., Pache, L., Burgstaller-  
971 Muehlbacher, S., De Jesus, P.D., Teriete, P., Hull, M.V., *et al.* (2020). Discovery of SARS-CoV-  
972 2 antiviral drugs through large-scale compound repurposing. *Nature* *586*, 113-119.
- 973  
974 Rossignol, J.-F. (2014). Nitazoxanide: a first-in-class broad-spectrum antiviral agent. *Antiviral*  
975 *Res* *110*, 94-103.

976  
977 Rossignol, J.-F., Matthew, C.B., Oaks, J.B., Bostick, G., Vora, K.N., Fulgencio, J., Mogelnicki,  
978 D., Bréchet, C., and Vanguard Study Group (2021). Early treatment with nitazoxanide prevents  
979 worsening of mild and moderate COVID-19 and subsequent hospitalization. medRxiv.  
980  
981 Rossignol, J.F., Hidalgo, H., Feregrino, M., Higuera, F., Gomez, W.H., Romero, J.L., Padierna,  
982 J., Geyne, A., and Ayers, M.S. (1998). A double-'blind' placebo-controlled study of nitazoxanide  
983 in the treatment of cryptosporidial diarrhoea in AIDS patients in Mexico. *Trans R Soc Trop Med*  
984 *Hyg* 92, 663-666.  
985  
986 Rossignol, J.F., La Frazia, S., Chiappa, L., Ciucci, A., and Santoro, M.G. (2009). Thiazolidines, a  
987 new class of anti-influenza molecules targeting viral hemagglutinin at the post-translational  
988 level. *J Biol Chem* 284, 29798-29808.  
989  
990 Sampaio, N.G., Chauveau, L., Hertzog, J., Bridgeman, A., Fowler, G., Moonen, J.P., Dupont,  
991 M., Russell, R.A., Noerenberg, M., and Rehwinkel, J. (2021). The RNA sensor MDA5 detects  
992 SARS-CoV-2 infection. *Sci Rep* 11, 13638.  
993  
994 Schroeder, B.C., Cheng, T., Jan, Y.N., and Jan, L.Y. (2008). Expression cloning of TMEM16A  
995 as a calcium-activated chloride channel subunit. *Cell* 134, 1019-1029.  
996  
997 Schumann, M., Gantke, T., and Muhlberger, E. (2009). Ebola virus VP35 antagonizes PKR  
998 activity through its C-terminal interferon inhibitory domain. *J Virol* 83, 8993-8997.  
999  
1000 Sia, S.F., Yan, L.-M., Chin, A.W.H., Fung, K., Poon, L.L.M., Nicholls, J.M., Peiris, M., and  
1001 Yen, H.-L. (2020). Pathogenesis and transmission of SARS-CoV-2 virus in golden Syrian  
1002 hamsters. *Nature* 583, 834-838.  
1003  
1004 Stachulski, A.V., Rossignol, J.F., Pate, S., Taujanskas, J., Robertson, C.M., Aerts, R., Pascal, E.,  
1005 Piacentini, S., Frazia, S., Santoro, M.G., *et al.* (2021). Synthesis, antiviral activity, preliminary  
1006 pharmacokinetics and structural parameters of thiazolide amine salts. *Future Med Chem* 13,  
1007 1731-1741.  
1008  
1009 Wang, M., Cao, R., Zhang, L., Yang, X., Liu, J., Xu, M., Shi, Z., Hu, Z., Zhong, W., and Xiao,  
1010 G. (2020). Remdesivir and chloroquine effectively inhibit the recently emerged novel  
1011 coronavirus (2019-nCoV) in vitro. *Cell Res* 30, 269-271.  
1012  
1013 White, K.M., Rosales, R., Yildiz, S., Kehrer, T., Miorin, L., Moreno, E., Jangra, S., Uccellini,  
1014 M.B., Rathnasinghe, R., Coughlan, L., *et al.* (2021). Plitidepsin has potent preclinical efficacy  
1015 against SARS-CoV-2 by targeting the host protein eEF1A. *Science* 371, 926-931.  
1016  
1017 Xie, X., Muruato, A., Lokugamage, K.G., Narayanan, K., Zhang, X., Zou, J., Liu, J.,  
1018 Schindewolf, C., Bopp, N.E., Aguilar, P.V., *et al.* (2020). An Infectious cDNA Clone of SARS-  
1019 CoV-2. *Cell Host Microbe* 27, 841-848 e843.  
1020

- 1021 Xu, W., Edwards, M.R., Borek, D.M., Feagins, A.R., Mittal, A., Alinger, J.B., Berry, K.N., Yen,  
1022 B., Hamilton, J., Brett, T.J., *et al.* (2014). Ebola virus VP24 targets a unique NLS binding site on  
1023 karyopherin alpha 5 to selectively compete with nuclear import of phosphorylated STAT1. *Cell*  
1024 *Host Microbe* *16*, 187-200.
- 1025  
1026 Yang, Y.D., Cho, H., Koo, J.Y., Tak, M.H., Cho, Y., Shim, W.S., Park, S.P., Lee, J., Lee, B.,  
1027 Kim, B.M., *et al.* (2008). TMEM16A confers receptor-activated calcium-dependent chloride  
1028 conductance. *Nature* *455*, 1210-1215.
- 1029  
1030 Yin, X., Riva, L., Pu, Y., Martin-Sancho, L., Kanamune, J., Yamamoto, Y., Sakai, K., Gotoh, S.,  
1031 Miorin, L., De Jesus, P.D., *et al.* (2021). MDA5 governs the innate immune response to SARS-  
1032 CoV-2 in lung epithelial cells. *Cell Rep* *34*, 108628.
- 1033  
1034 Zhang, A.P., Bornholdt, Z.A., Liu, T., Abelson, D.M., Lee, D.E., Li, S., Woods, V.L., Jr., and  
1035 Saphire, E.O. (2012). The ebola virus interferon antagonist VP24 directly binds STAT1 and has  
1036 a novel, pyramidal fold. *PLoS Pathog* *8*, e1002550.
- 1037

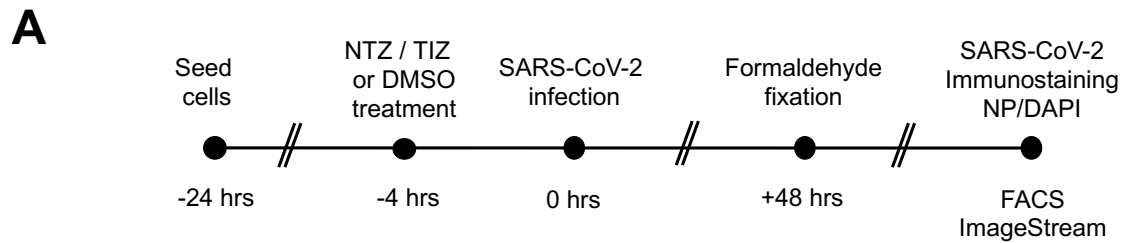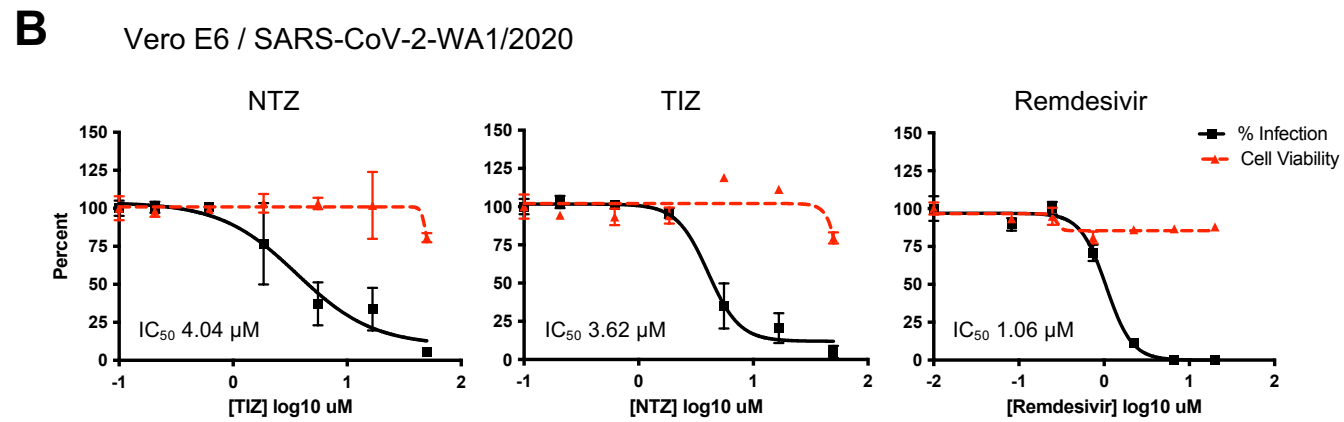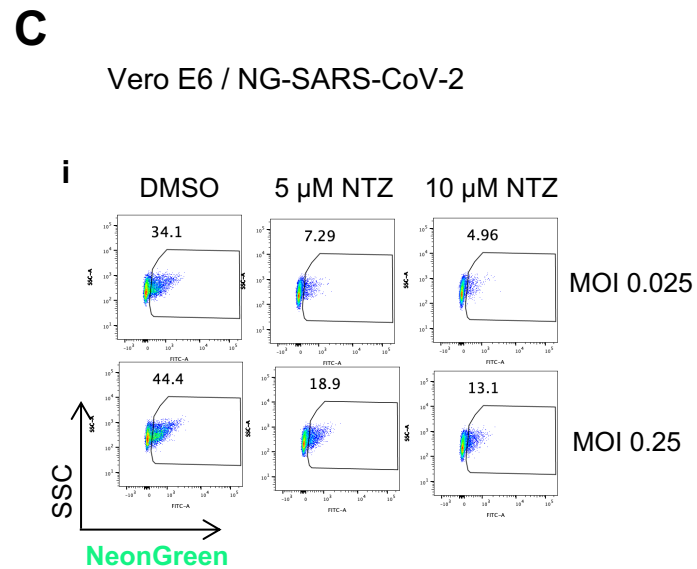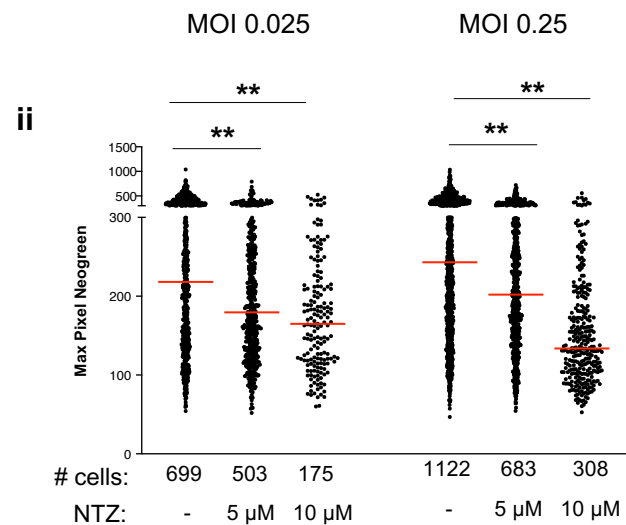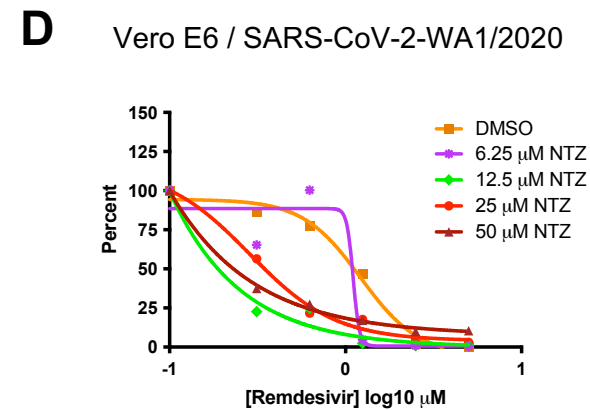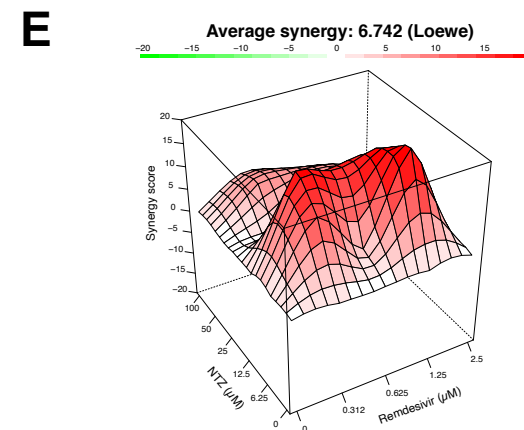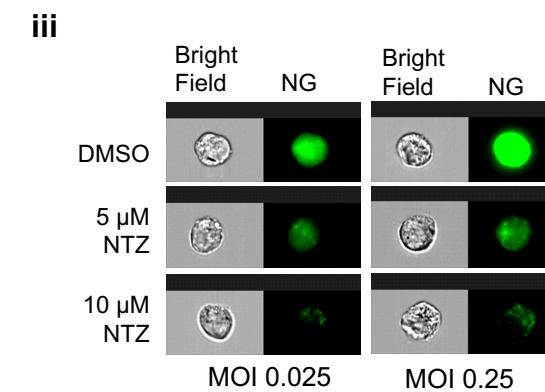

Fig. 1

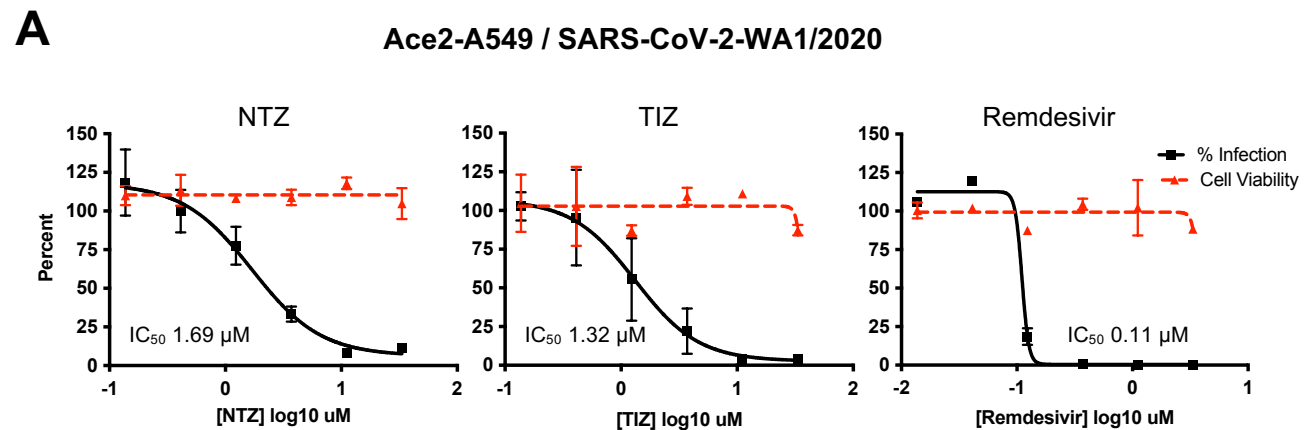

**B** **Ace2-A549 / Neon-Green-SARS-CoV-2**

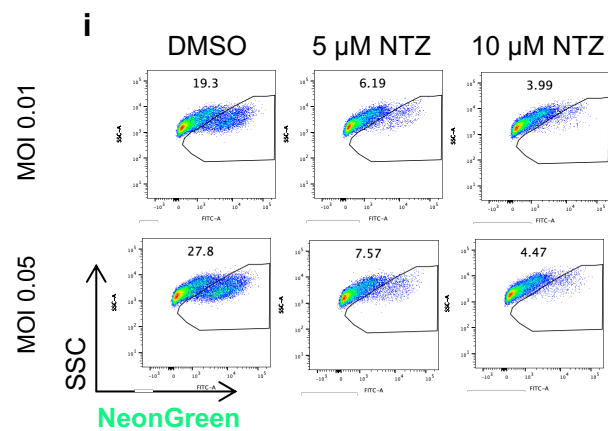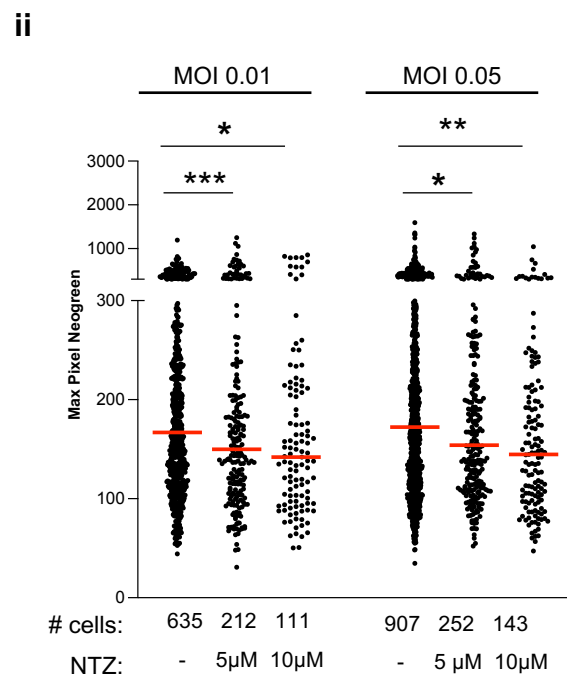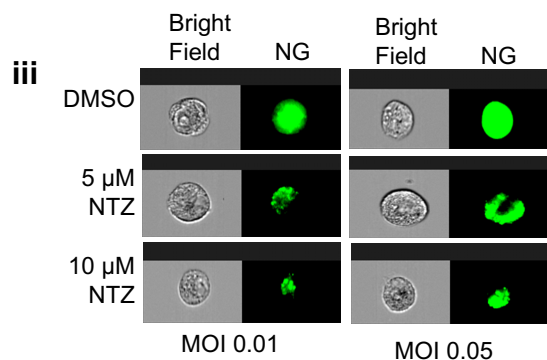

**C** **Ace2-A549 WT and IFNAR-KO / Neon-Green-SARS-CoV-2**

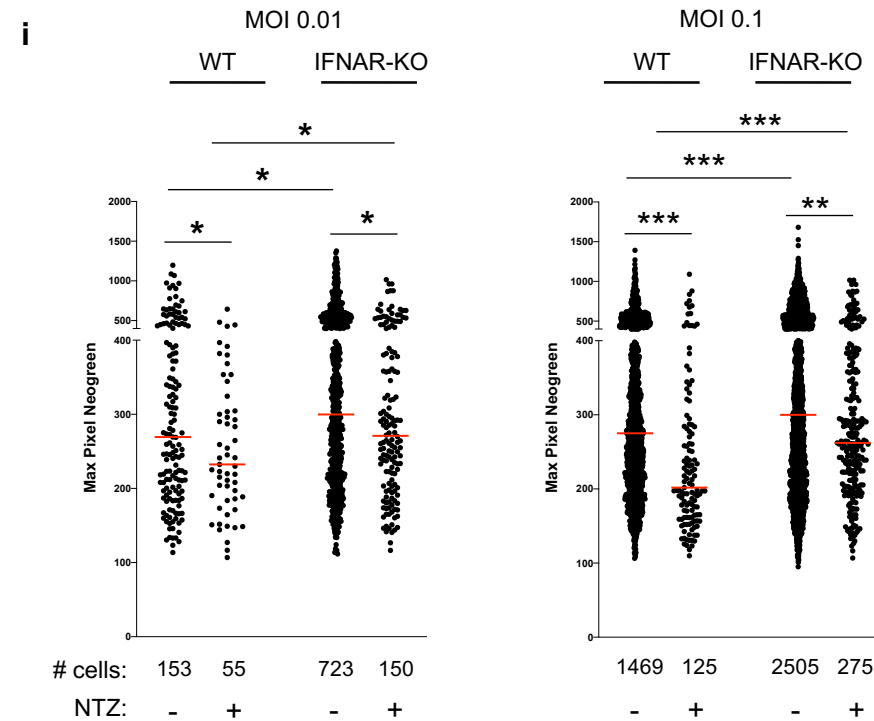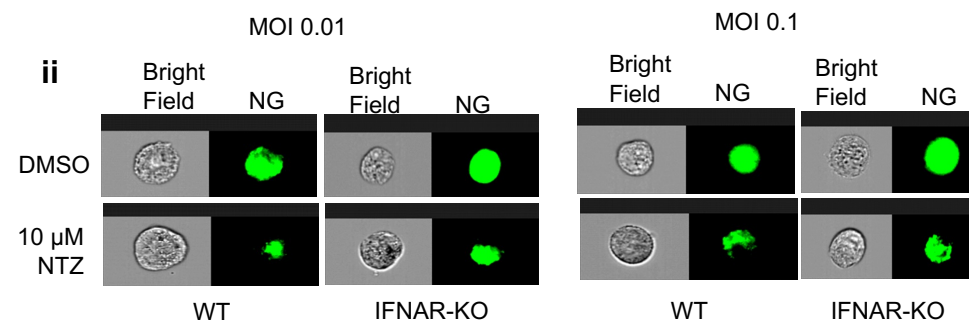

Fig. 2

**A****H9 cells / SARS-CoV-2-WA1/2020**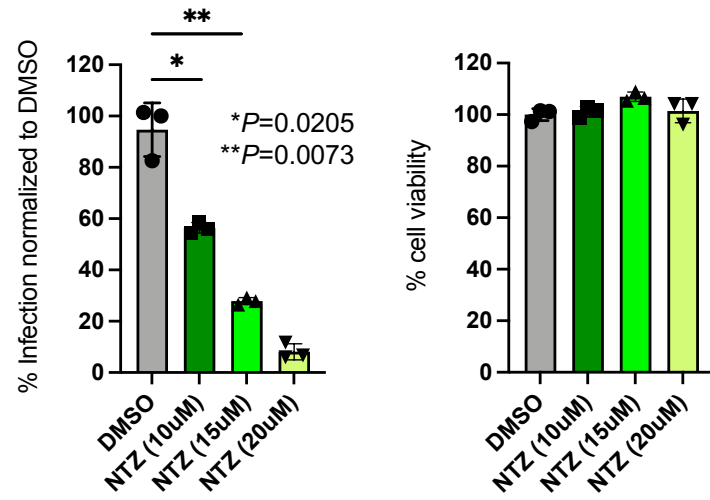**B****iAT2 cells / SARS-CoV-2-WA1/2020**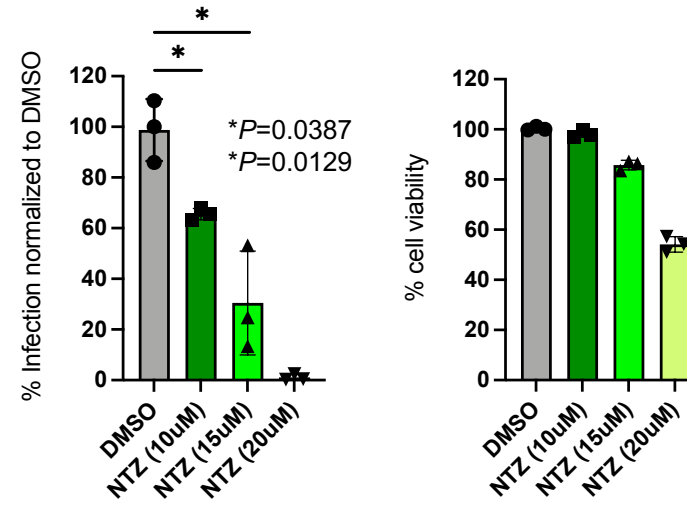**C****iAT2 cells / NG-SARS-CoV-2**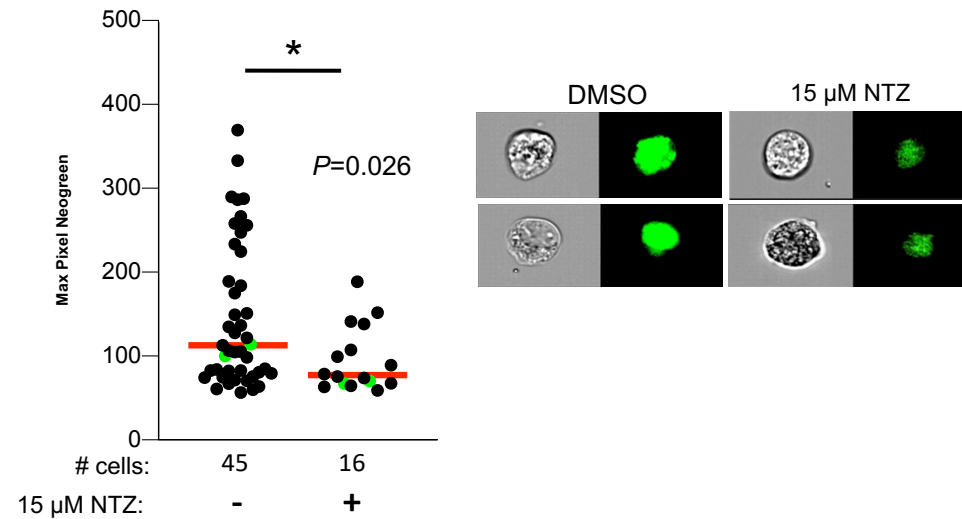**Fig. 3**



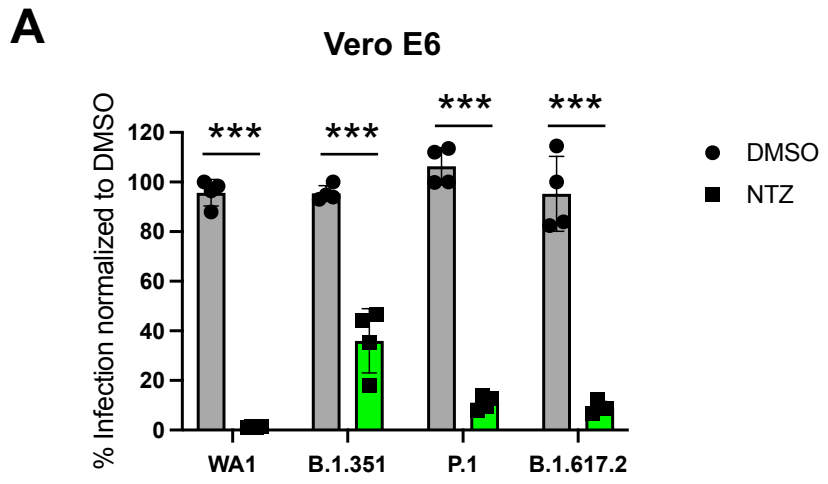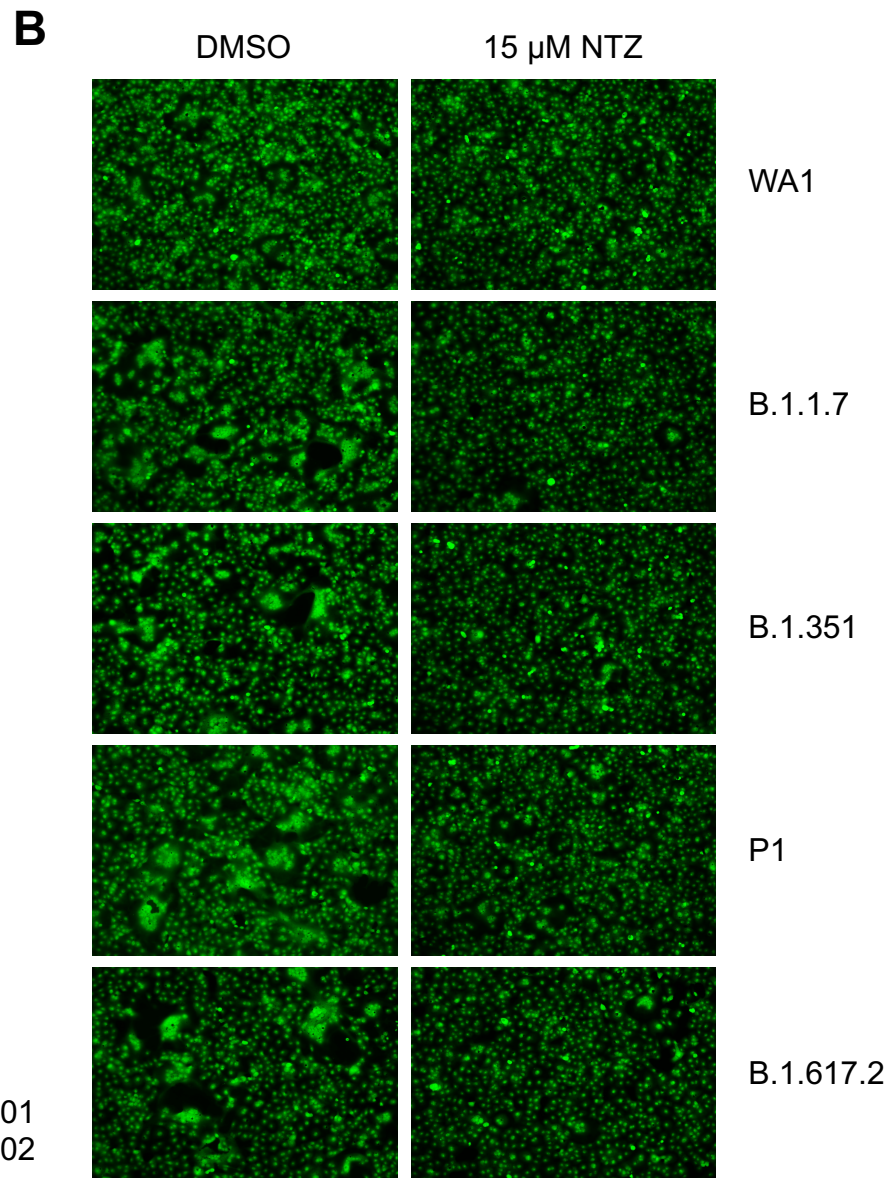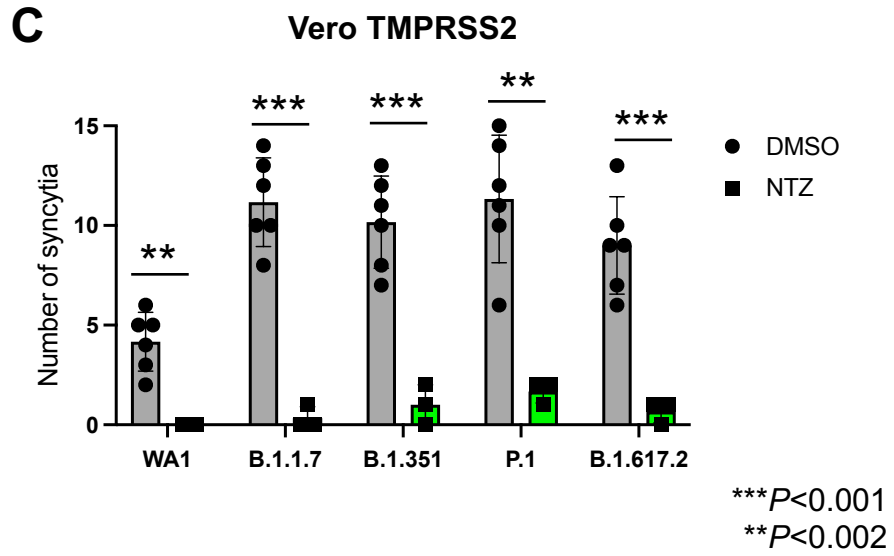

Fig. 4



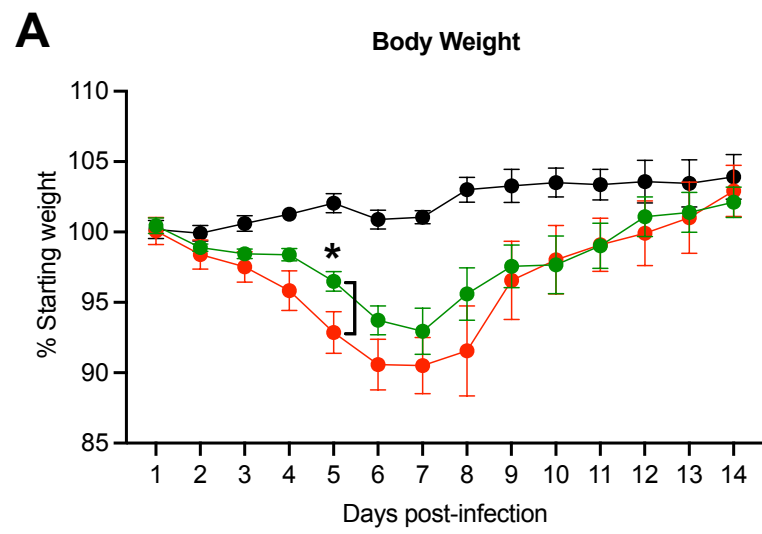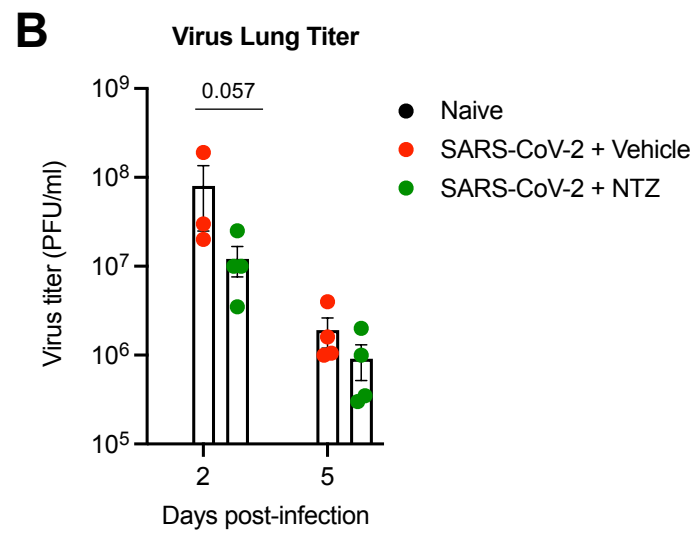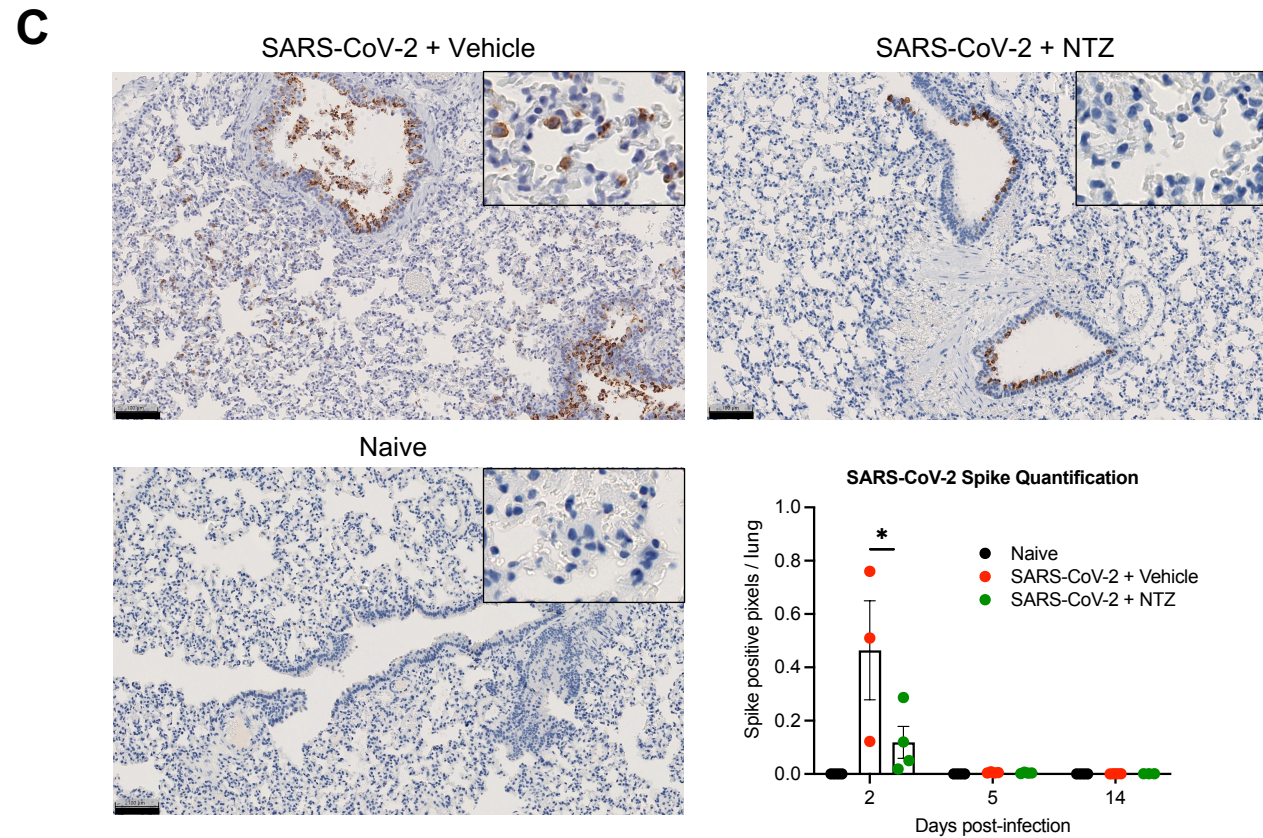

Fig. 5



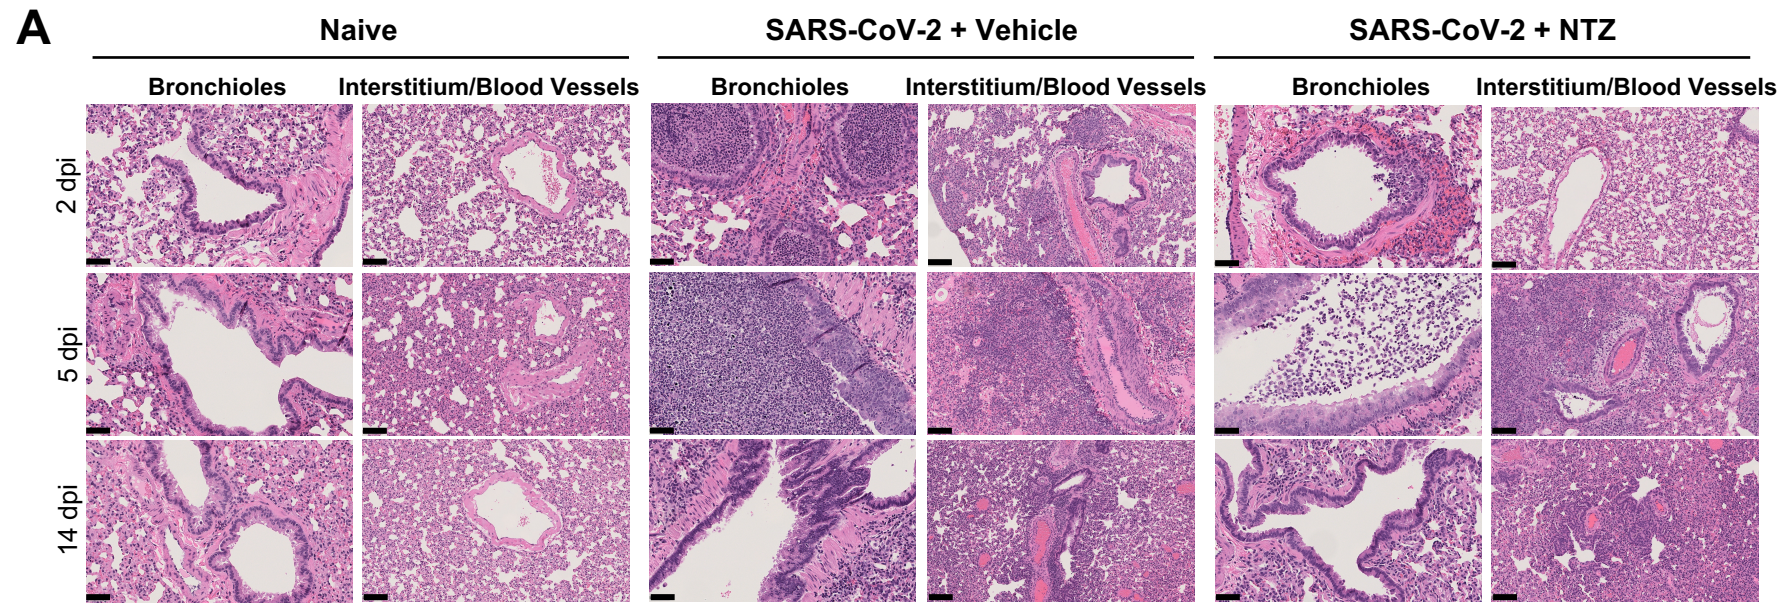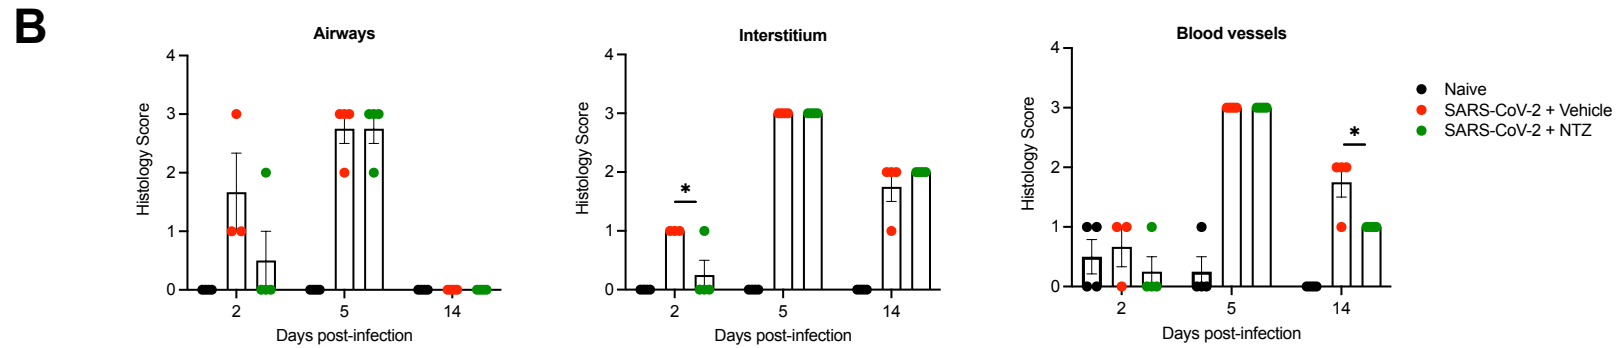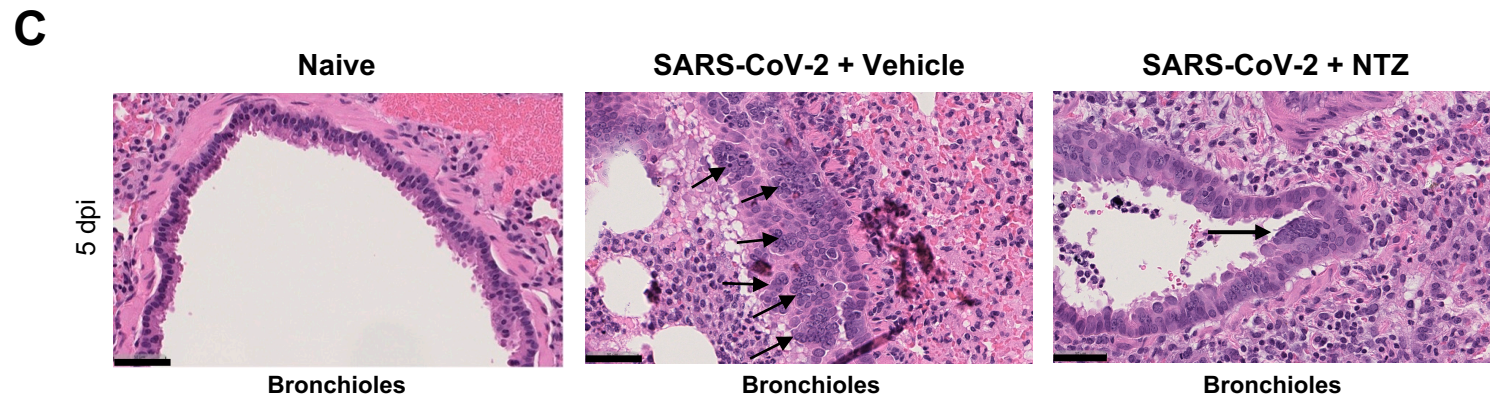

Fig. 6
