# Supplementary material for: The oral drug nitazoxanide restricts SARS-CoV-2 infection and attenuates disease pathogenesis in Syrian hamsters
Source: bioRxiv or medRxiv preprint supplement (doi:10.1101/2022.02.08.479634), 2022-02-09
Supplement: Supplementary file [file media-1.pdf]

## SUPPLEMENTARY FIGURE LEGENDS

**SFig 1: Confocal microscopy images of Vero E6 (A) or Ace2-A549 (B) cells infected with SARS-CoV-2.** At 24 hrs post-infection, cells were stained with antibodies against NP or against the dsRNA intermediate of replication (Scale bars, 20  $\mu$ m).

**SFig 2. SARS-CoV-2 infects Ace2-HEK293T cells and replication is inhibited by NTZ.** Concentration-response curves for viral infectivity and for cell viability in Ace2-HEK293T cells treated with NTZ or RDV as described in the Figure 1 legend. Cells were infected with SARS-CoV-2 (isolate USA-WA1/2020) at an MOI of 0.25.

**SFig 3. Functional validation of Ace2-A549 IFNAR-KO cells.**

**A.** WT and IFNAR-KO Ace2-A549 cells were treated for 45 minutes with 1,000 U/ml of type I IFN before lysis. Expression of the indicated protein was determined by Western blot using actin as a loading control. **B.** WT and IFNAR-KO Ace2-A549 cells were stimulated for 24 hrs with 100 U/ml of type I IFN. The expression of IFITM3 mRNA was determined by qRT-PCR. IFITM3 mRNA levels relative to cyclophilin are shown.

**SFig 4. Infection of IAT2 cells with NG-SARS-CoV-2 shown by confocal microscopy.** At 7 days post-plating 400,000 iAT2s/transwell were infected with NeonGreen-SARS-CoV-2 (NG-SARS-CoV-2) at an MOI of 0.01 for 2 days, fixed, and evaluated by confocal microscopy.

**SFig 5. High magnification of images shown in Figure 6 at day 2 and 14 of lung from naïve and from SARS-CoV-2+PBS/vehicle- vs. SARS-CoV-2+NTZ-treated animals at day 2 and 14 post-infection. Top: Bronchioles.** At 2 dpi SARS-CoV-2 PBS/vehicle-treated: bronchioles (black arrows) are occluded by necrotic cellular debris and neutrophils and histiocytes, with

neighboring bronchiole epithelial apoptosis and/or necrosis represented by nuclear fragmentation (black hashed boxes). At 2 dpi SARS-CoV-2 NTZ-treated: segmental bronchiole epithelial degeneration and denuding represented by a hashed box, with less overall luminal exudate. **Bottom: Interstitium/Blood Vessels.** At 14 dpi SARS-CoV-2 PBS/vehicle-treated: mild-to-moderate residual perivascular lymphocytic infiltrate (see black box inset) neighboring areas of residual Alveolar type 2 (AT2) cell hyperplasia (blue arrows). At 14dpi SARS-CoV-2 NTZ-treated: minimal sporadic residual perivascular lymphocytic infiltrate (see black box inset at higher magnification) neighboring areas of residual AT2 cell hyperplasia (blue arrows). Scale bars: top row (bronchioles), 50  $\mu\text{m}$ ; bottom row: interstitium/blood vessels, 100  $\mu\text{m}$ .

### **S Table 1. Monoplex SARS-CoV-2 Spike DAB Immunohistochemistry (IHC)**

### **S Table 2. Lung Ordinal Scoring System**

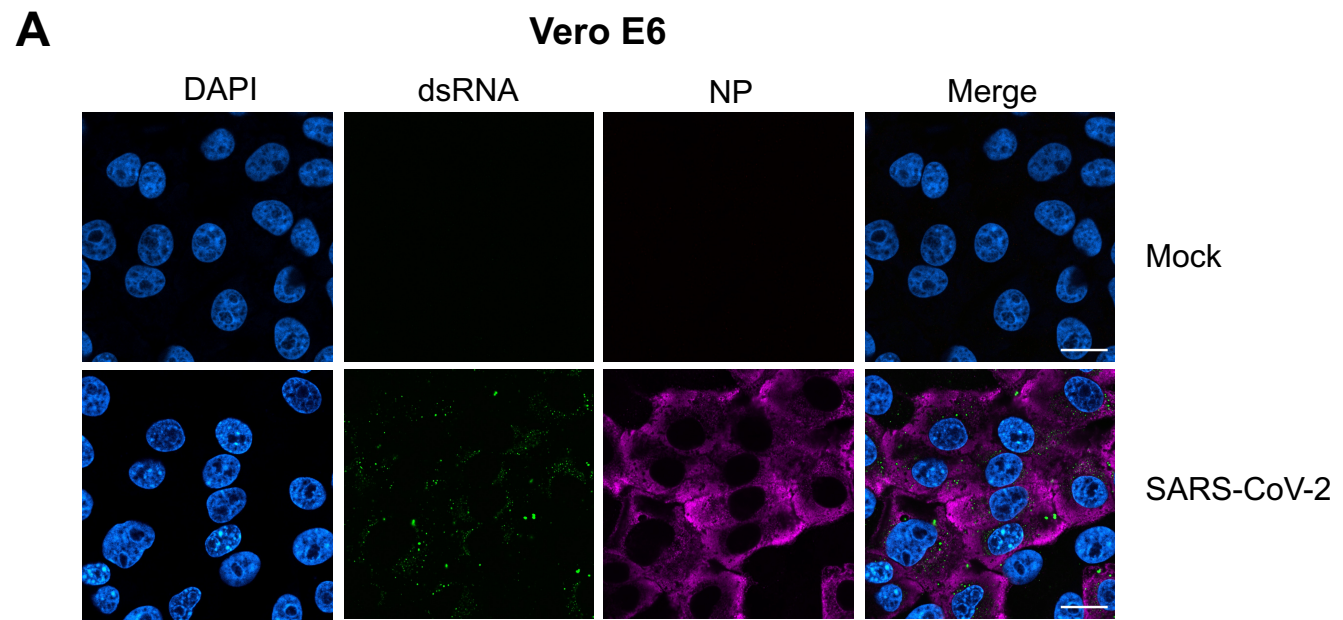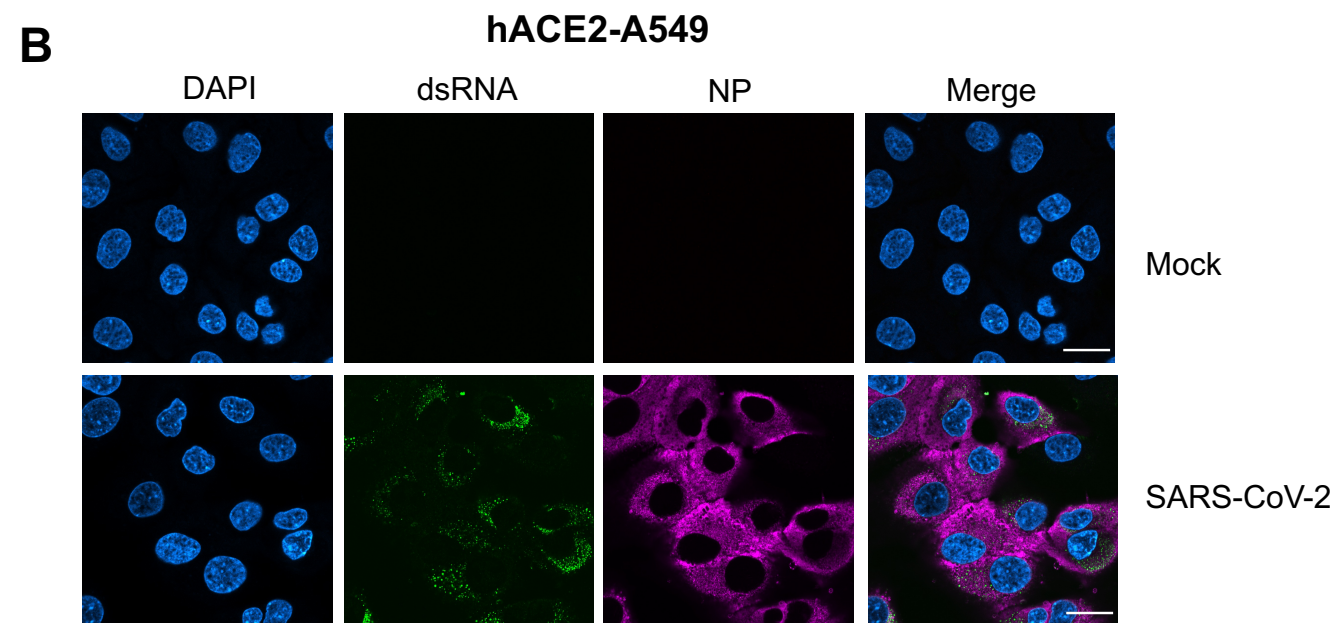

S. Fig. 1

Ace2-HEK293T / SARS-CoV-2-WA1/2020

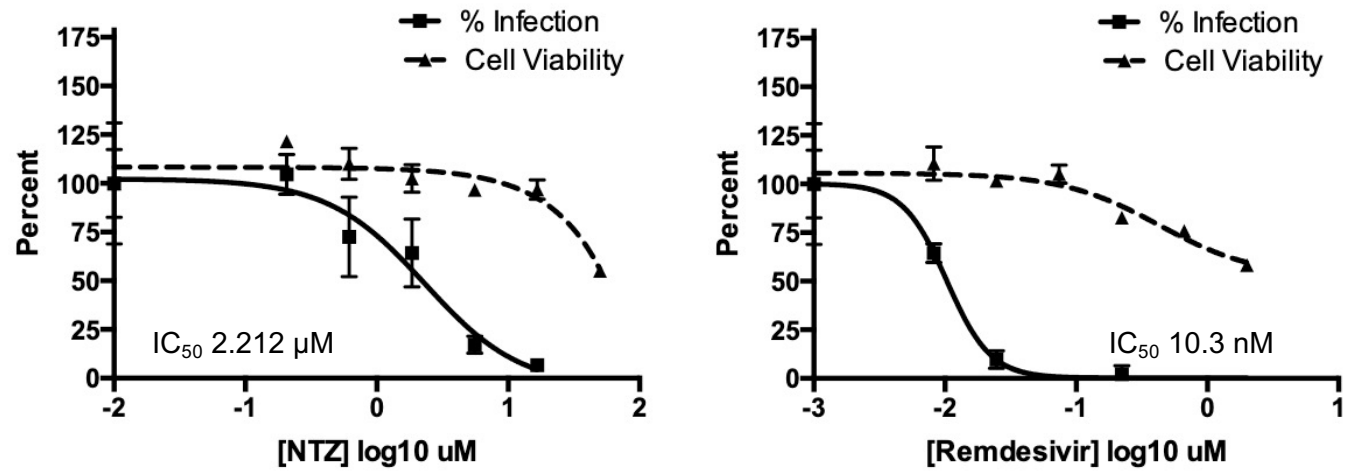

**A**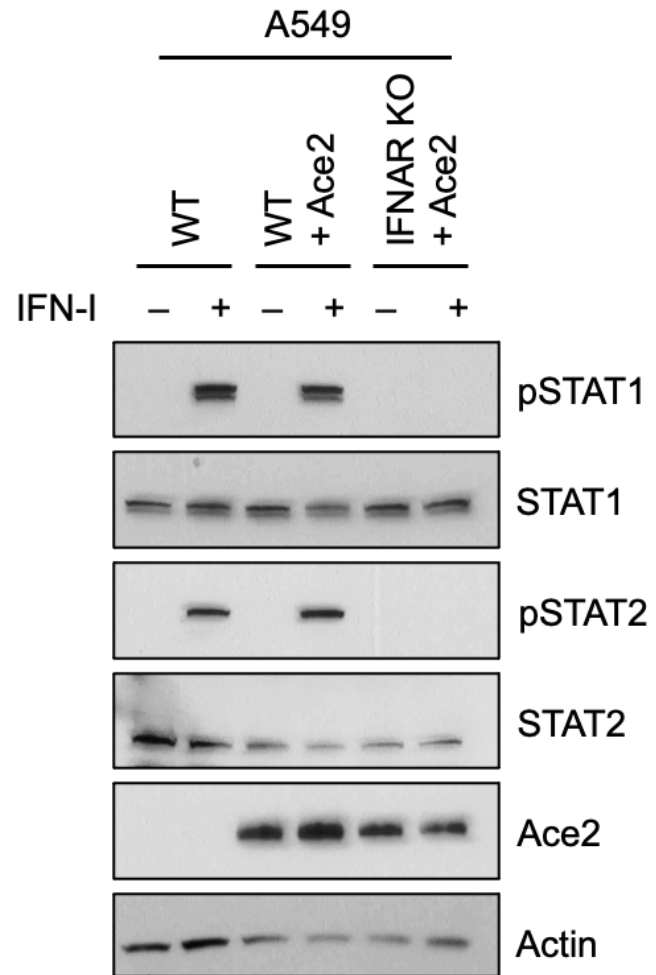**B**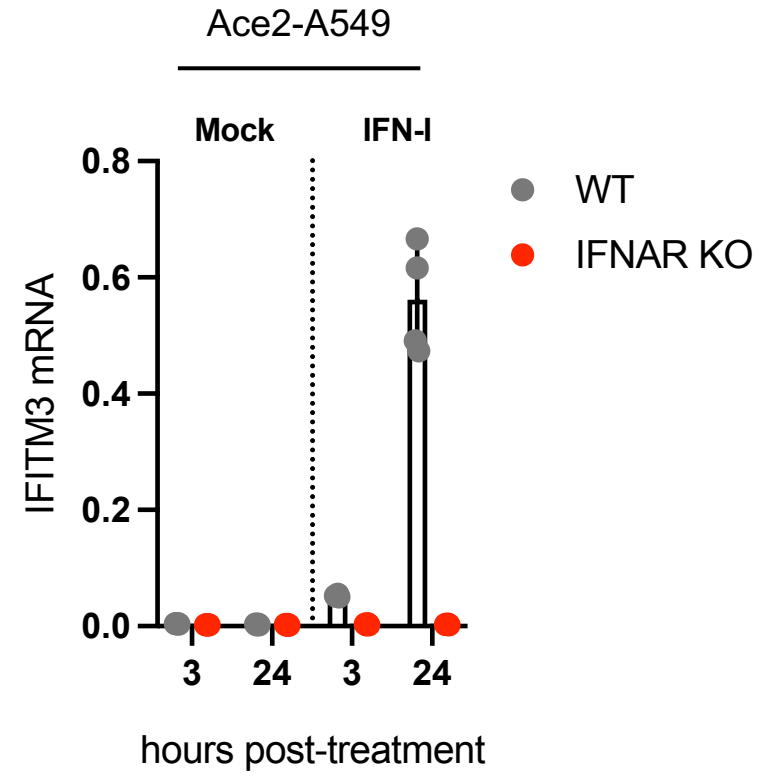

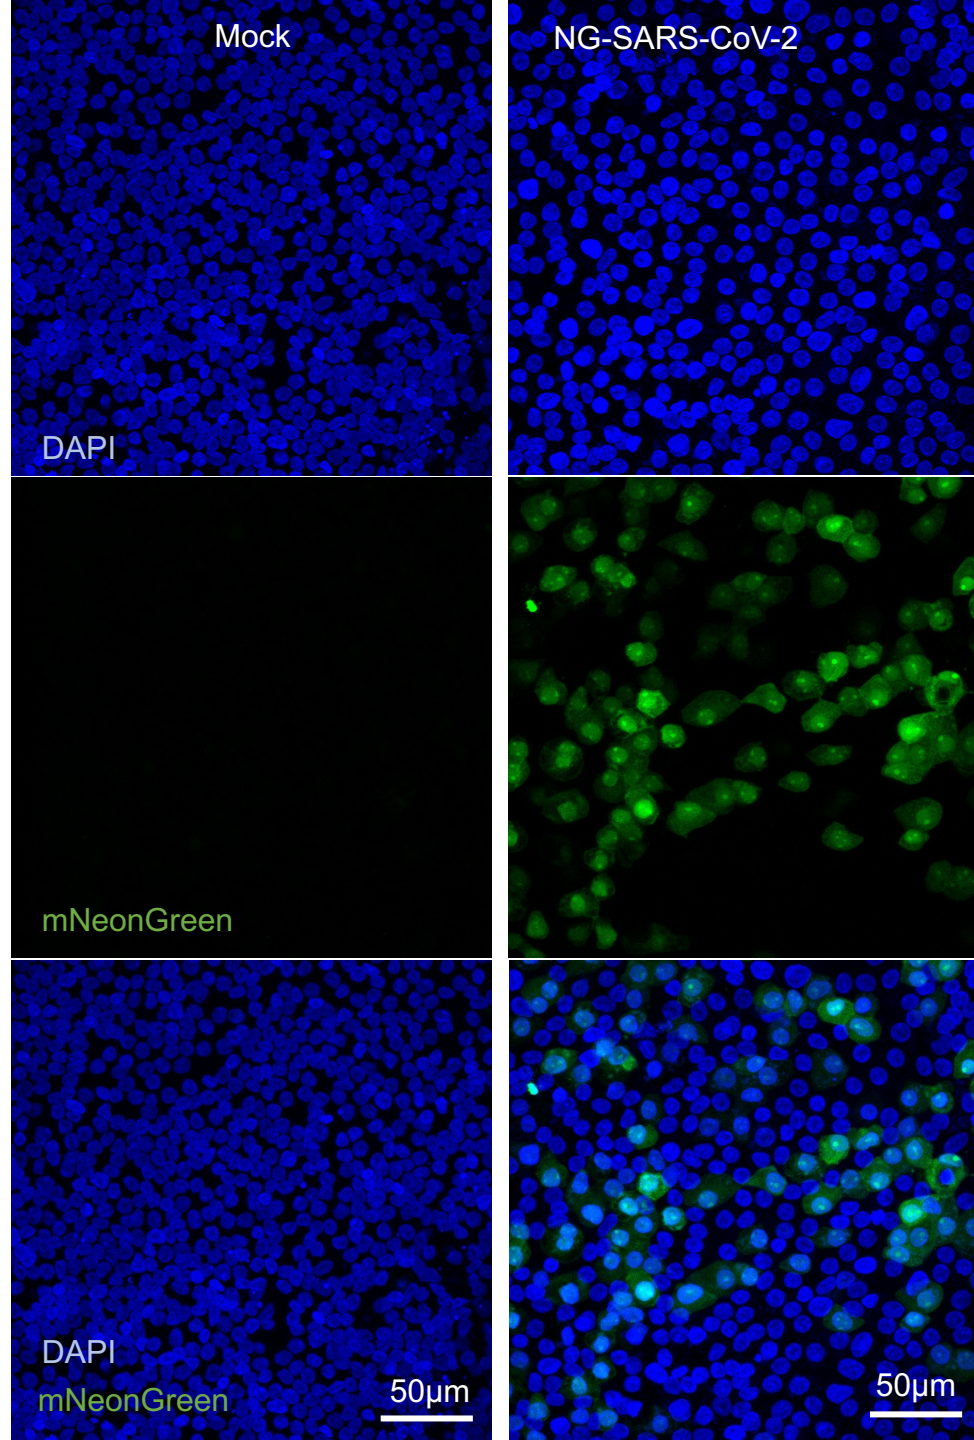

S. Fig. 4

**Naive**

**SARS-CoV-2-PBS**

**SARS-CoV-2 NTZ**

**2dpi Bronchioles**

**14dpi Interstitium/Blood Vessels**

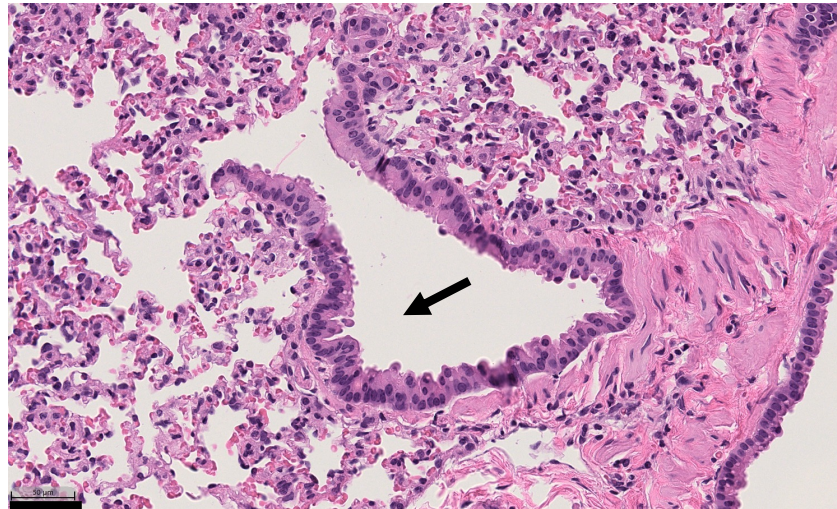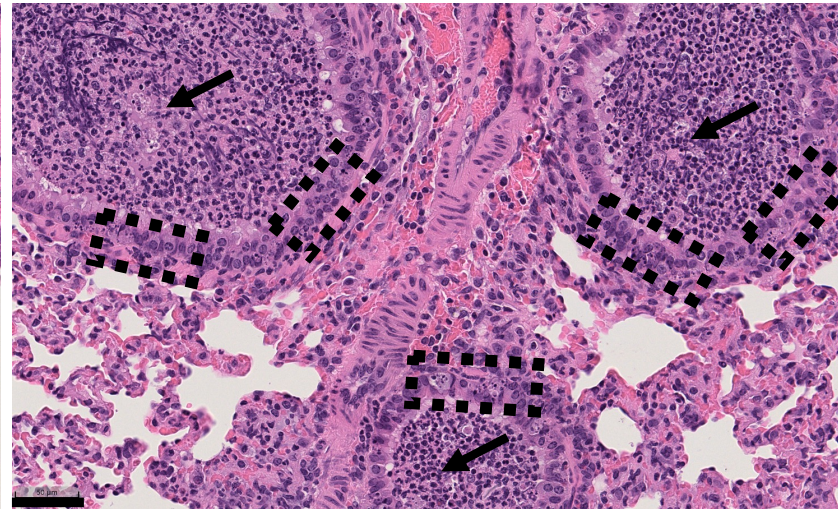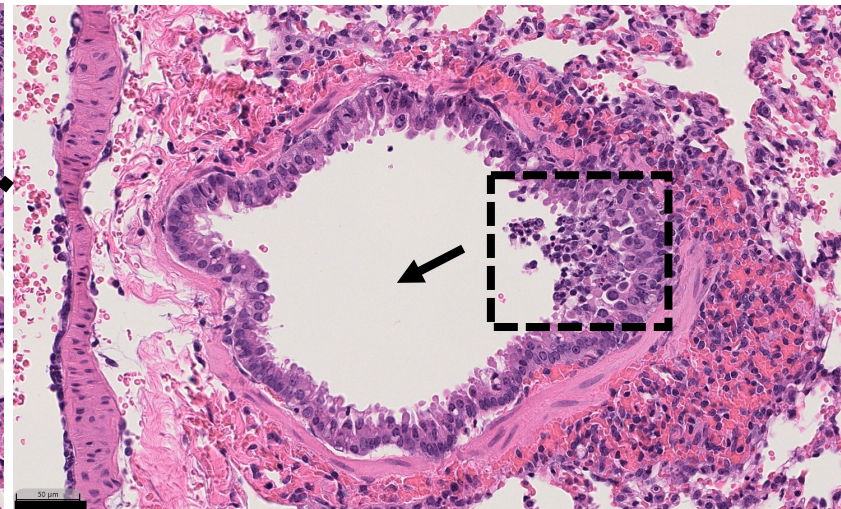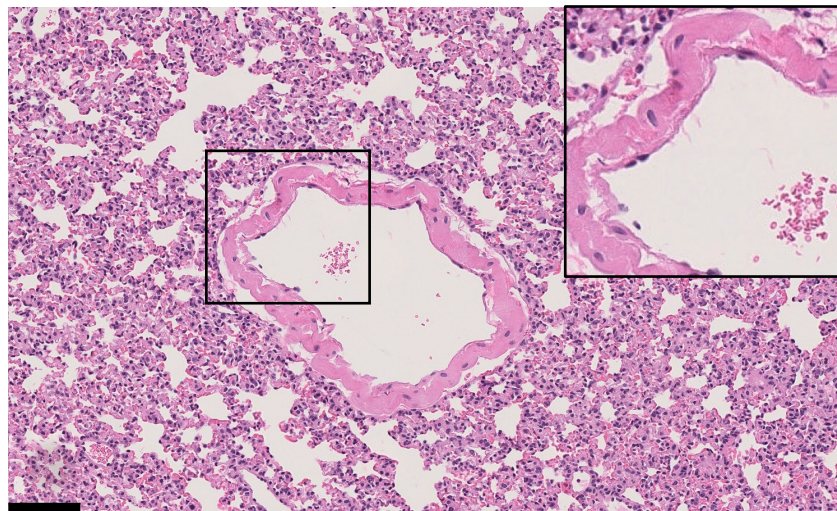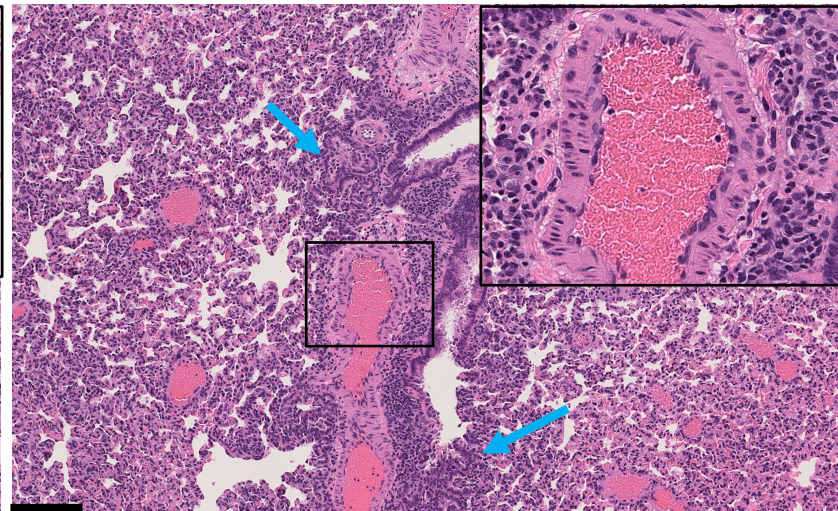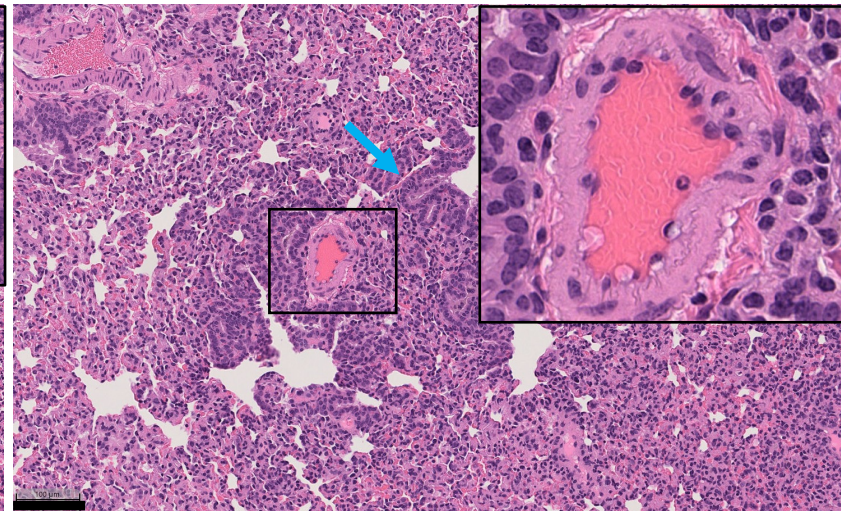

**S. Fig. 5**

## Supplementary Tables

| <b>S Table 1. Monoplex SARS-CoV-2 Spike DAB Immunohistochemistry (IHC)</b> |                  |                                 |                           |           |
|----------------------------------------------------------------------------|------------------|---------------------------------|---------------------------|-----------|
| Species                                                                    | Antigen          | Manufacturer and Clone          | Primary Antibody Dilution | Chromogen |
| Ms monoclonal                                                              | SARS-CoV-2 Spike | Cell Signaling Technology E7U60 | 1:900                     | DAB       |
| Diaminobenzidine-DAB; IHC-immunohistochemistry                             |                  |                                 |                           |           |



**Suppl. Table 2. Lung Ordinal Scoring System**

| <b>Airways (bronchioles)</b> |                                                                                                                                                                                                                                                                                                                                                                                                                 |
|------------------------------|-----------------------------------------------------------------------------------------------------------------------------------------------------------------------------------------------------------------------------------------------------------------------------------------------------------------------------------------------------------------------------------------------------------------|
| 0                            | Within normal limits.                                                                                                                                                                                                                                                                                                                                                                                           |
| 1                            | Mild bronchiole epithelial degeneration/necrosis and hyperplasia/hypertrophy; mononuclear +/- neutrophil peribronchiolar and/or airway infiltrates                                                                                                                                                                                                                                                              |
| 2                            | Moderate bronchiole epithelial degeneration/necrosis and hyperplasia/hypertrophy; mononuclear +/- neutrophil peribronchiolar infiltrates; infiltration of bronchiole airways with moderate mononuclear infiltrates, neutrophils, necrotic cellular debris, +/- erythrocytes.                                                                                                                                    |
| 3                            | Marked to severe bronchiole epithelial degeneration/necrosis and/or hyperplasia/hypertrophy with syncytial cells; mononuclear +/- neutrophil peribronchiolar infiltrates; +/- infiltration of bronchiole airways with mononuclear infiltrates, neutrophils, necrotic cellular debris, +/- erythrocytes.                                                                                                         |
| <b>Interstitialium</b>       |                                                                                                                                                                                                                                                                                                                                                                                                                 |
| 0                            | Within normal limits.                                                                                                                                                                                                                                                                                                                                                                                           |
| 1-A<br>(acute)               | Mild focal to multifocal interstitial expansion and/or alveolar infiltration by mononuclear cells +/- neutrophils, with no observable edema, hemorrhage, and/or fibrin exudation.                                                                                                                                                                                                                               |
| 1-C<br>(chronic)             | Mild to moderate alveolar type 2 (AT2) pneumocyte hyperplasia, with mild interstitial or alveolar mononuclear infiltrates, +/- pleural and/or interstitial fibrosis.                                                                                                                                                                                                                                            |
| 2-A<br>(acute)               | Moderate multifocal interstitial expansion and/or alveolar infiltration by mononuclear cells (histiocytes and/or lymphocytes) and neutrophils, with mild edema, hemorrhage, and/or fibrin exudation, admixed with low amounts of cellular debris.                                                                                                                                                               |
| 2-C<br>(chronic)             | Mild to moderate multifocal interstitial expansion and/or alveolar infiltration by mononuclear cells +/- neutrophils, with mild to moderate AT2 pneumocyte hyperplasia                                                                                                                                                                                                                                          |
| 3-A<br>(acute)               | Marked to severe multifocal interstitial expansion and/or alveolar infiltration by mononuclear cells and neutrophils, with moderate to regionally severe edema, hemorrhage, and/or fibrin exudation, with mild to moderate cellular debris.                                                                                                                                                                     |
| 3-C<br>(chronic)             | Severe alveolar type 2 (AT2) pneumocytes hyperplasia +/- alveolar bronchiolization. Prominent anisocytosis and cytomegaly of AT2 pneumocytes, with increased mitotic figures. Moderate to marked multifocal interstitial expansion and/or alveolar infiltration of mononuclear (histiocytes and/or lymphocytes) and neutrophils with mild edema, hemorrhage, and/or fibrin exudation, and mild cellular debris. |
| <b>Blood vessels</b>         |                                                                                                                                                                                                                                                                                                                                                                                                                 |
| 0                            | Within normal limits.                                                                                                                                                                                                                                                                                                                                                                                           |
| 1                            | Mild mononuclear perivascular infiltrate +/- reactive endothelial hypertrophy.                                                                                                                                                                                                                                                                                                                                  |
| 2                            | Moderate mononuclear perivascular infiltrate +/- neutrophils, prominent reactive endothelium, +/- margination and/or transmigration of leukocytes.                                                                                                                                                                                                                                                              |
| 3                            | Marked mononuclear infiltrate +/- neutrophils, prominent perivascular edema, reactive endothelium, and +/- margination and/or transmigration of leukocytes.                                                                                                                                                                                                                                                     |
